# Supplementary material for: Community-deliverable exercise and anxiety in adults with arthritis and other rheumatic diseases: a systematic review with meta-analysis of randomised controlled trials
Source: PubMed Central journal article supplement — BMJ Open. 2018 Feb 17;8(2):e019138. doi: 10.1136/bmjopen-2017-019138 (PMC5855450; doi:10.1136/bmjopen-2017-019138), 2018-02-17
Supplement: bmjopen-2017-019138supp001.pdf [file bmjopen-2017-019138supp001.pdf]

# Supplementary file 1. PubMed search

Details - PubMed - NCBI

## Search Details

### Query Translation:

```
((("exercise"[MeSH Terms] OR "exercise"[All Fields]) OR ("exercise"[MeSH Terms] OR "exercise"[All Fields] OR ("physical"[All Fields] AND "activity"[All Fields]) OR "physical activity"[All Fields]) OR ("physical fitness"[MeSH Terms] OR ("physical"[All Fields] AND "fitness"[All Fields]) OR "physical fitness"[All Fields]) CR ("physical therapy modalities"[MeSH Terms] OR ("physical"[All Fields] AND "therapy"[All Fields] AND "modalities"[All Fields]) OR "physical therapy modalities"[All Fields]) OR ("physical"[All Fields] OR "physical therapy modalities"[All Fields]) OR ("physical"[All Fields]
```

### Result:

[167](#)

### Translations:

|                      |                                                                                                                                                                                                                                                                   |
|----------------------|-------------------------------------------------------------------------------------------------------------------------------------------------------------------------------------------------------------------------------------------------------------------|
| exercise             | "exercise"[MeSH Terms] OR "exercise"[All Fields]                                                                                                                                                                                                                  |
| physical activity    | "exercise"[MeSH Terms] OR "exercise"[All Fields] OR ("physical"[All Fields] AND "activity"[All Fields]) OR "physical activity"[All Fields]                                                                                                                        |
| physical fitness     | "physical fitness"[MeSH Terms] OR ("physical"[All Fields] AND "fitness"[All Fields]) OR "physical fitness"[All Fields]                                                                                                                                            |
| physical therapy     | "physical therapy modalities"[MeSH Terms] OR ("physical"[All Fields] AND "therapy"[All Fields] AND "modalities"[All Fields]) OR "physical therapy modalities"[All Fields] OR ("physical"[All Fields] AND "therapy"[All Fields]) OR "physical therapy"[All Fields] |
| osteoarthritis       | "osteoarthritis"[MeSH Terms] OR "osteoarthritis"[All Fields]                                                                                                                                                                                                      |
| rheumatoid arthritis | "arthritis, rheumatoid"[MeSH Terms] OR ("arthritis"[All Fields] AND "rheumatoid"[All Fields]) OR "rheumatoid arthritis"[All Fields] OR ("rheumatoid"[All Fields] AND "arthritis"[All Fields])                                                                     |
| arthritis            | "arthritis"[MeSH Terms] OR "arthritis"[All Fields]                                                                                                                                                                                                                |
| fibromyalgia         | "fibromyalgia"[MeSH Terms] OR "fibromyalgia"[All Fields]                                                                                                                                                                                                          |
| anxiety              | "anxiety"[MeSH Terms] OR "anxiety"[All Fields]                                                                                                                                                                                                                    |
