# Supplementary material for: Community-deliverable exercise and anxiety in adults with arthritis and other rheumatic diseases: a systematic review with meta-analysis of randomised controlled trials
Source: PubMed Central journal article supplement — BMJ Open. 2018 Feb 17;8(2):e019138. doi: 10.1136/bmjopen-2017-019138 (PMC5855450; doi:10.1136/bmjopen-2017-019138), 2018-02-17
Supplement: bmjopen-2017-019138supp002.pdf [file bmjopen-2017-019138supp002.pdf]

Supplementary File 2. Excluded Studies, including reasons for exclusion.

1. 12th Commonwealth International Sport conference, 19-23 July 2002, Manchester, United Kingdom: abstract book. London;: Association of Commonwealth Universities 2002. *inappropriate study design*
2. ABSTRACTS. *Journal of Orthopaedic & Sports Physical Therapy* 2005;35(6):389-96. *inappropriate study design*
3. Fibromyalgia: poorly understood; treatments are disappointing. *Prescribe international* 2009;18(102):169-73. [published Online First: 2009/09/15] *inappropriate study design*
4. A Controlled Examination of Medical and Psychosocial Factors Associated With Low Back Pain in Combination With Widespread Musculoskeletal Pain. *Physical therapy* 2009;89(8):786-803. *inappropriate study design*
5. Acupuncture. *Focus on Alternative and Complementary Therapies* 2010;15(2):163-69. doi: 10.1211/fact.15.2.0065 *inappropriate intervention*
6. 2013 SYR Accepted Poster Abstracts. *International journal of yoga therapy* 2013;23 Suppl:32-53. [published Online First: 2013/01/01] *inappropriate study design*
7. Abbott R, Whear R, Nikolaou V, et al. Tumour necrosis factor-alpha inhibitor therapy in chronic physical illness: A systematic review and meta-analysis of the effect on depression and anxiety. *Journal of psychosomatic research* 2015;79(3):175-84. doi: 10.1016/j.jpsychores.2015.04.008 [published Online First: 2015/05/04] *inappropriate study design*
8. Adachi T, Nakae A, Maruo T, et al. Validation of the Japanese Version of the Pain Self-Efficacy Questionnaire in Japanese Patients with Chronic Pain. *Pain Medicine* 2014;15(8):1405-17. doi: 10.1111/pme.12446 *inappropriate study design*
9. Akhavan J. The effect of a dyadic intervention on self-efficacy, physical functioning, and anxiety/depression in older adults post joint replacement surgery [Ph.D.]. University of California, Los Angeles, 2008. *inappropriate study design*
10. Akman-Demir G, Saip S, Siva A. Behçet's disease. *Current Treatment Options in Neurology* 2011;13(3):290-310. doi: 10.1007/s11940-011-0120-2 *inappropriate study design*
11. Alamo MM, Moral RR, de Torres LAP. Evaluation of a patient-centred approach in generalized musculoskeletal chronic pain/fibromyalgia patients in primary care. *Patient education and counseling* 2002;48(1):23-31. doi: 10.1016/S0738-3991(02)00095-2 *inappropriate intervention*
12. Alayli G, Kuru O, Bilgici A. The effects of aerobic exercise and home exercise on pain and disability in patients with knee osteoarthritis. [Turkish]. *Journal of Rheumatology and Medical Rehabilitation* 2007; 18(2). <http://onlinelibrary.wiley.com/o/cochrane/clcentral/articles/761/CN-00707761/frame.html>. *inappropriate comparison group*
13. Alipour B, Homayouni-Rad A, Vaghef-Mehrabany E, et al. Effects of Lactobacillus casei supplementation on disease activity and inflammatory cytokines in rheumatoid arthritis patients: a randomized double-blind clinical trial. *International journal of rheumatic diseases* 2014;17(5):519-27. doi: 10.1111/1756-185X.12333 *inappropriate intervention*

14. Ambrose KR, Golightly YM. Physical exercise as non-pharmacological treatment of chronic pain: Why and when. *Best Practice & Research in Clinical Rheumatology* 2015;29(1):120-30. doi: 10.1016/j.berh.2015.04.022 *inappropriate study design*
15. Andrews NE, Strong J, Meredith PJ. Activity Pacing, Avoidance, Endurance, and Associations With Patient Functioning in Chronic Pain: A Systematic Review and Meta-Analysis. *Archives of physical medicine and rehabilitation* 2012;93(11):2109-21. doi: 10.1016/j.apmr.2012.05.029 *inappropriate study design*
16. Ang D, Jensen M, Steiner J, et al. Combining cognitive-behavioral therapy and milnacipran for fibromyalgia: a feasibility randomized-controlled trial. *The Clinical journal of pain* 2013; 29(9).  
<http://onlinelibrary.wiley.com/o/cochrane/clcentral/articles/880/CN-00918880/frame.html>. *inappropriate study design*
17. Appelbaum KA, Blanchard EB, Hickling EJ, et al. Cognitive behavioral treatment of a veteran population with moderate to severe rheumatoid arthritis. *Behavior Therapy* 1988;19(4):489-502. doi: 10.1016/S0005-7894(88)80019-4 *inappropriate intervention*
18. Archer T, Josefsson T, Lindwall M. Effects of Physical Exercise on Depressive Symptoms and Biomarkers in Depression. *Cns & Neurological Disorders-Drug Targets* 2014;13(10):1640-53. *inappropriate study design*
19. Arcos-Carmona IM, Castro-Sanchez AM, Mataran-Penarrocha GA, et al. [Effects of aerobic exercise program and relaxation techniques on anxiety, quality of sleep, depression, and quality of life in patients with fibromyalgia: a randomized controlled trial]. *Medicina clinica* 2011;137(9):398-401. doi: 10.1016/j.medcli.2010.09.045 [published Online First: 2011/02/25] *inappropriate intervention*
20. Arends RY, Bode C, Taal E, et al. A goal management intervention for polyarthritis patients: rationale and design of a randomized controlled trial. *BMC musculoskeletal disorders* 2013;14:239. doi: 10.1186/1471-2474-14-239 [published Online First: 2013/08/15] *inappropriate intervention*
21. Arne M, Janson C, Janson S, et al. Physical activity and quality of life in subjects with chronic disease: chronic obstructive pulmonary disease compared with rheumatoid arthritis and diabetes mellitus. *Scandinavian journal of primary health care* 2009;27(3):141-7. doi: 10.1080/02813430902808643 [published Online First: 2009/03/24] *inappropriate study design*
22. Arnold L, Wang F, Ahl J, et al. Improvement in multiple dimensions of fatigue in patients with fibromyalgia treated with duloxetine: secondary analysis of a randomized, placebo-controlled trial. *Arthritis research & therapy* 2011; 13(3).  
<http://onlinelibrary.wiley.com/o/cochrane/clcentral/articles/474/CN-00843474/frame.html>. *inappropriate intervention*
23. Arnold L, Zlateva G, Sadosky A, et al. Correlations between Fibromyalgia Symptom and Function Domains and Patient Global Impression of Change: A Pooled Analysis of Three Randomized, Placebo-Controlled Trials of Pregabalin. *Pain medicine (Malden, Mass)* 2011; 12(2).  
<http://onlinelibrary.wiley.com/o/cochrane/clcentral/articles/608/CN-01016608/frame.html>. *inappropriate study design*

24. Arnold LM. Strategies for managing fibromyalgia. *The American journal of medicine* 2009;122(12 Suppl):S31-43. doi: 10.1016/j.amjmed.2009.09.009 [published Online First: 2010/01/09] *inappropriate study design*
25. Arnold LM, Arsenault P, Huffman C, et al. Once daily controlled-release pregabalin in the treatment of patients with fibromyalgia: A phase III, double-blind, randomized withdrawal, placebo-controlled study. *Current Medical Research and Opinion* 2014;30(10):2069-83. doi: 10.1185/03007995.2014.928275 *inappropriate intervention*
26. Arnold LM, Clauw D, Wang F, et al. Flexible dosed duloxetine in the treatment of fibromyalgia: a randomized, double-blind, placebo-controlled trial. *The Journal of rheumatology* 2010;37(12):2578-86. doi: 10.3899/jrheum.100365 [published Online First: 2010/09/17] *inappropriate intervention*
27. Arnold LM, Crofford LJ, Martin SA, et al. The effect of anxiety and depression on improvements in pain in a randomized, controlled trial of pregabalin for treatment of fibromyalgia. *Pain Medicine* 2007;8(8):633-38. doi: 10.1111/j.1526-4637.2007.00332.x *inappropriate intervention*
28. Arnold LM, Russell IJ, Diri EW, et al. A 14-week, randomized, double-blinded, placebo-controlled monotherapy trial of pregabalin in patients with fibromyalgia. *The Journal of Pain* 2008;9(9):792-805. doi: 10.1016/j.jpain.2008.03.013 *inappropriate intervention*
29. Arnold LM, Wang F, Ahl J, et al. Improvement in multiple dimensions of fatigue in patients with fibromyalgia treated with duloxetine: secondary analysis of a randomized, placebo-controlled trial. *Arthritis research & therapy* 2011;13(3):R86. doi: 10.1186/ar3359 [published Online First: 2011/06/15] *inappropriate intervention*
30. Arnold LM, Williams DA, Hudson JI, et al. Development of responder definitions for fibromyalgia clinical trials. *Arthritis and rheumatism* 2012;64(3):885-94. doi: 10.1002/art.33360 [published Online First: 2011/09/29] *inappropriate outcomes*
31. Arnold LM, Zhang S, Pangallo BA. Efficacy and safety of duloxetine 30 mg/d in patients with fibromyalgia: A randomized, double-blind, placebo-controlled study. *The Clinical journal of pain* 2012;28(9):775-81. doi: 10.1097/AJP.0b013e3182510295 *inappropriate outcomes*
32. Arnold LM, Zlateva G, Sadosky A, et al. Correlations between fibromyalgia symptom and function domains and patient global impression of change: a pooled analysis of three randomized, placebo-controlled trials of pregabalin. *Pain medicine (Malden, Mass)* 2011;12(2):260-7. doi: 10.1111/j.1526-4637.2010.01047.x [published Online First: 2011/01/27] *inappropriate study design*
33. Assis MR, Silva LE, Alves AM, et al. A randomized controlled trial of deep water running: clinical effectiveness of aquatic exercise to treat fibromyalgia. *Arthritis and rheumatism* 2006;55(1):57-65. doi: 10.1002/art.21693 *inappropriate comparison group*
34. Ayrál X, Gicquere C, Duhalde A, et al. Effects of video information on preoperative anxiety level and tolerability of joint lavage in knee osteoarthritis. *Arthritis and rheumatism* 2002;47(4):380-2. doi: 10.1002/art.10559 [published Online First: 2002/09/05] *inappropriate intervention*

35. Bae S, Gun S, Mok C, et al. Improved health outcomes with etanercept versus usual DMARD therapy in an Asian population with established rheumatoid arthritis. *BMC musculoskeletal disorders* 2013; 14. <http://onlinelibrary.wiley.com/o/cochrane/clcentral/articles/280/CN-00864280/frame.html>. *inappropriate intervention*
36. Bagdath AO, Donmez A, Eroksuz R, et al. Does addition of 'mud-pack and hot pool treatment' to patient education make a difference in fibromyalgia patients? A randomized controlled single blind study. *International journal of biometeorology* 2015;59(12):1905-11. doi: 10.1007/s00484-015-0997-7 *inappropriate intervention*
37. Barlow J, Turner A, Wright C. A randomized controlled study of the Arthritis Self-Management Programme in the UK. *Health education research* 2000; 15(6). <http://onlinelibrary.wiley.com/o/cochrane/clcentral/articles/444/CN-00330444/frame.html>. *inappropriate intervention*
38. Barlow JH, Powell LA, Gilchrist M, et al. The effectiveness of the Training and Support Program for parents of children with disabilities: a randomized controlled trial. *Journal of psychosomatic research* 2008;64(1):55-62. doi: 10.1016/j.jpsychores.2007.06.006 [published Online First: 2007/12/26] *inappropriate intervention*
39. Barsky AJ, Ahern DK, Orav EJ, et al. A Randomized Trial of Three Psychosocial Treatments for the Symptoms of Rheumatoid Arthritis. *Seminars in arthritis and rheumatism* 2010;40(3):222-32. doi: 10.1016/j.semarthrit.2010.04.001 *inappropriate intervention*
40. Basler HD. Group treatment for pain and discomfort. *Patient education and counseling* 1993;20(2-3):167-75. [published Online First: 1993/05/01] *inappropriate intervention*
41. Basseij EJ. Longitudinal changes in selected physical capabilities: muscle strength, flexibility and body size. *Age and Ageing* 1998;27:12-16. *inappropriate study design*
42. Bateman L, Sarzi-Puttini P, Burbridge CL, et al. Burden of illness in fibromyalgia patients with comorbid depression. *Clinical and experimental rheumatology* 2016;34(2 Suppl 96):S106-13. [published Online First: 2016/04/09] *inappropriate study design*
43. Baudic S, Attal N, Mhalla A, et al. Unilateral repetitive transcranial magnetic stimulation of the motor cortex does not affect cognition in patients with fibromyalgia. *Journal of Psychiatric Research* 2013;47(1):72-77. doi: 10.1016/j.jpsychires.2012.09.003 *inappropriate intervention*
44. Bearne L, Walsh N, Jessep S, et al. Feasibility of an exercise-based rehabilitation programme for chronic hip pain. *Musculoskeletal care* 2011; 9(3). <http://onlinelibrary.wiley.com/o/cochrane/clcentral/articles/898/CN-01124898/frame.html>. *inappropriate intervention*
45. Bement MKH, Weyer A, Hartley S, et al. Pain Perception After Isometric Exercise in Women With Fibromyalgia. *Archives of physical medicine and rehabilitation* 2011;92(1):89-95. doi: 10.1016/j.apmr.2010.10.006 *inappropriate study design*
46. Bennell K, Ahamed Y, Jull G, et al. Physical Therapist-Delivered Pain Coping Skills Training and Exercise for Knee Osteoarthritis: Randomized Controlled Trial. *Arthritis care & research* 2016; 68(5).

- <http://onlinelibrary.wiley.com/o/cochrane/clcentral/articles/882/CN-01153882/frame.html>. *inappropriate comparison group*
47. Bennell KL, Rini C, Keefe F, et al. Effects of Adding an Internet-Based Pain Coping Skills Training Protocol to a Standardized Education and Exercise Program for People With Persistent Hip Pain (HOPE Trial): Randomized Controlled Trial Protocol. *Physical therapy* 2015;95(10):1408-22. doi: 10.2522/ptj.20150119 [published Online First: 2015/05/30] *inappropriate study design*
  48. Bennett R, Russell I, Choy E, et al. Evaluation of Patient-Rated Stiffness Associated With Fibromyalgia: A Post-Hoc Analysis of 4 Pooled, Randomized Clinical Trials of Duloxetine. *Clinical therapeutics* 2012; 34(4). <http://onlinelibrary.wiley.com/o/cochrane/clcentral/articles/551/CN-00896551/frame.html>. *inappropriate intervention*
  49. Bialosky JE, Bishop MD, Robinson ME, et al. Spinal Manipulative Therapy Has an Immediate Effect on Thermal Pain Sensitivity in People With Low Back Pain: A Randomized Controlled Trial. *Physical therapy* 2009;89(12):1292-303. doi: 10.2522/ptj.20090058 *inappropriate population*
  50. Birbara C, Ruoff G, Sheldon E, et al. Efficacy and safety of rofecoxib 12.5 mg and celecoxib 200 mg in two similarly designed osteoarthritis studies. *Current medical research and opinion* 2006; 22(1). <http://onlinelibrary.wiley.com/o/cochrane/clcentral/articles/019/CN-00554019/frame.html>. *inappropriate intervention*
  51. Bircan C, Karasel SA, Akgun B, et al. Effects of muscle strengthening versus aerobic exercise program in fibromyalgia. *Rheumatology international* 2008;28(6):527-32. doi: 10.1007/s00296-007-0484-5 [published Online First: 2007/11/06] *inappropriate comparison group*
  52. Bishop MD, Beneciuk JM, George SZ. Immediate reduction in temporal sensory summation after thoracic spinal manipulation. *Spine Journal* 2011;11(5):440-46. doi: 10.1016/j.spinee.2011.03.001 *inappropriate intervention*
  53. Blikman T, Rienstra W, van Raaij TM, et al. Duloxetine in OsteoArthritis (DOA) study: study protocol of a pragmatic open-label randomised controlled trial assessing the effect of preoperative pain treatment on postoperative outcome after total hip or knee arthroplasty. *BMJ open* 2016;6(3):e010343. doi: 10.1136/bmjopen-2015-010343 [published Online First: 2016/03/05] *inappropriate study design*
  54. Blumenthal JA, Babyak MA, Moore KA, et al. Effects of exercise training on older patients with major depression. *Archives of Internal Medicine* 1999;159(19):2349-56. doi: 10.1001/archinte.159.19.2349 *inappropriate population*
  55. Bojner Horwitz E, Kowalski J, Theorell T, et al. Dance/movement therapy in fibromyalgia patients: Changes in self-figure drawings and their relation to verbal self-rating scales. *The Arts in Psychotherapy* 2006;33(1):11-25. doi: <http://dx.doi.org/10.1016/j.aip.2005.05.004> *inappropriate intervention*
  56. Bojner-Horwitz E, Theorell T, Anderberg UM. Dance/movement therapy and changes in stress-related hormones: A study of fibromyalgia patients with video-interpretation. *The Arts in Psychotherapy* 2003;30(5):255-64. doi: 10.1016/j.aip.2003.07.001 *inappropriate outcomes*

57. Bojner-Horwitz E, Theorell T, Maria Anderberg U. Dance/movement therapy and changes in stress-related hormones: a study of fibromyalgia patients with video-interpretation. *The Arts in Psychotherapy* 2003;30(5):255-64. doi: <http://dx.doi.org/10.1016/j.aip.2003.07.001> *inappropriate intervention*
58. Bongi SM, Del Rosso A, Di Felice C, et al. Ressequier method and Qi Gong sequentially integrated in patients with fibromyalgia syndrome. *Clinical and experimental rheumatology* 2012;30(6):S51-S58. *inappropriate comparison group*
59. Bongi SM, Paoletti G, Cala M, et al. Efficacy of rehabilitation with Tai Ji Quan in an Italian cohort of patients with Fibromyalgia Syndrome. *Complementary therapies in clinical practice* 2016;24:109-15. doi: 10.1016/j.ctcp.2016.05.010 *inappropriate intervention*
60. Booth FW, Roberts CK, Laye MJ. Lack of Exercise Is a Major Cause of Chronic Diseases. *Comprehensive Physiology* 2012;2(2):1143-211. doi: 10.1002/cphy.c110025 *inappropriate study design*
61. Boschen KA, Robinson E, Campbell KA, et al. Results from 10 Years of a CBT Pain Self-Management Outpatient Program for Complex Chronic Conditions. *Pain Research & Management* 2016 doi: 10.1155/2016/4678083 *inappropriate study design*
62. Bossen D, Buskermolen M, Veenhof C, et al. Adherence to a web-based physical activity intervention for patients with knee and/or hip Osteoarthritis: A mixed method study. *Journal of medical Internet research* 2013;15(10):55-66. doi: 10.2196/jmir.2742 *inappropriate comparison group*
63. Bossen D, Veenhof C, Kloek C, et al. The association between psychological factors and physical activity levels in patients with knee and hip osteoarthritis. *Physiotherapy (United Kingdom)* 2015; 101. <http://onlinelibrary.wiley.com/o/cochrane/clcentral/articles/535/CN-01126535/frame.html>. *inappropriate study design*
64. Bossen D, Veenhof C, Van Beek KEC, et al. Effectiveness of a Web-Based Physical Activity Intervention in Patients With Knee and/or Hip Osteoarthritis: Randomized Controlled Trial. *Journal of medical Internet research* 2013;15(11) doi: 10.2196/jmir.2662 *inappropriate intervention*
65. Boyer L, Dousset A, Roussel P, et al. rTMS in fibromyalgia: a randomized trial evaluating QoL and its brain metabolic substrate. *Neurology* 2014;82(14):1231-8. doi: 10.1212/wnl.0000000000000280 [published Online First: 2014/03/29] *inappropriate intervention*
66. Bradt J, Norris M, Shim M, et al. Vocal Music Therapy for Chronic Pain Management in Inner-City African Americans: A Mixed Methods Feasibility Study. *Journal of Music Therapy* 2016;53(2):178-206. doi: 10.1093/jmt/thw004 *inappropriate intervention*
67. Braz AS, Morais LCS, Paula AP, et al. Effects of Panax ginseng extract in patients with fibromyalgia: A 12-week, randomized, double-blind, placebo-controlled trial. *Revista Brasileira de Psiquiatria* 2013;35(1):21-28. doi: 10.1016/j.rbp.2013.01.004 *inappropriate intervention*
68. Broderick J, Jungaenel D, Schwartz J. Written emotional expression produces health benefits in fibromyalgia patients. *Psychosomatic medicine* 2005; 67(2).

- <http://onlinelibrary.wiley.com/o/cochrane/clcentral/articles/627/CN-00560627/frame.html>. *inappropriate intervention*
69. Brus H, Taal E, Laar M, et al. Patient education and disease activity: a study among rheumatoid arthritis patients. *Arthritis care and research : the official journal of the Arthritis Health Professions Association* 1997; 10(5). <http://onlinelibrary.wiley.com/o/cochrane/clcentral/articles/155/CN-00145155/frame.html>. *inappropriate study design*
70. Busch A. Hydrotherapy improves pain, knee strength, and quality of life in women with fibromyalgia. *Australian Journal of Physiotherapy* 2007;53(1):64-64. *inappropriate study design*
71. Buskila D, Abu-Shakra M, Neumann L, et al. Balneotherapy for fibromyalgia at the Dead Sea. *Rheumatology international* 2001;20(3):105-8. doi: 10.1007/s002960000085 [published Online First: 2001/05/17] *inappropriate intervention*
72. Buszewicz M, Rait G, Griffin M, et al. Self management of arthritis in primary care: randomised controlled trial. *BMJ (Clinical research ed)* 2006;333(7574):879. doi: 10.1136/bmj.38965.375718.80 [published Online First: 2006/10/17] *inappropriate intervention*
73. Buttawat V, Eungpinichpong W, Kaber D, et al. Acute effects of traditional Thai massage on electroencephalogram in patients with scapulocostal syndrome. *Complementary Therapies in Medicine* 2012;20(4):167-74. doi: 10.1016/j.ctim.2012.02.002 *inappropriate intervention*
74. Büyükyılmaz F, Aştı T. The effect of relaxation techniques and back massage on pain and anxiety in Turkish total hip or knee arthroplasty patients. *Pain Management Nursing* 2013;14(3):143-54. doi: 10.1016/j.pmn.2010.11.001 *inappropriate intervention*
75. Calandre EP, Rico-Villademoros F. The role of antipsychotics in the management of fibromyalgia. *CNS drugs* 2012;26(2):135-53. doi: 10.2165/11597130-000000000-00000 [published Online First: 2012/02/03] *inappropriate study design*
76. Calandre EP, Rodriguez-Claro ML, Rico-Villademoros F, et al. Effects of pool-based exercise in fibromyalgia symptomatology and sleep quality: a prospective randomised comparison between stretching and Ai Chi. *Clinical and experimental rheumatology* 2009;27(5 Suppl 56):S21-8. [published Online First: 2010/03/12] *inappropriate intervention*
77. Campbell CM, McCauley L, Bounds SC, et al. Changes in pain catastrophizing predict later changes in fibromyalgia clinical and experimental pain report: cross-lagged panel analyses of dispositional and situational catastrophizing. *Arthritis research & therapy* 2012;14(5):R231. doi: 10.1186/ar4073 [published Online First: 2012/10/27] *inappropriate outcomes*
78. Cancelliere C. Are workplace health promotion/wellness programs effective at improving presenteeism (on-the-job productivity) in workers? A systematic review and best evidence synthesis of the literature [M.P.H.]. Lakehead University (Canada), 2011. *inappropriate study design*

79. Carbonell-Baeza A, Aparicio VA, Chillon P, et al. Effectiveness of multidisciplinary therapy on symptomatology and quality of life in women with fibromyalgia. *Clinical and experimental rheumatology* 2011;29(6):S97-S103. *inappropriate study design*
80. Carbonell-Baeza A, Aparicio VA, Martins-Pereira CM, et al. Efficacy of Biodanza for Treating Women with Fibromyalgia. *Journal of Alternative and Complementary Medicine* 2010;16(11):1191-200. doi: 10.1089/acm.2010-0039 *inappropriate study design*
81. Carbonell-Baeza A, Romero A, Aparicio VA, et al. Preliminary Findings of a 4-Month Tai Chi Intervention on Tenderness, Functional Capacity, Symptomatology, and Quality of Life in Men With Fibromyalgia. *American Journal of Mens Health* 2011;5(5):421-29. doi: 10.1177/1557988311400063 *inappropriate intervention*
82. Carbonell-Baeza A, Ruizz JR, Aparicio VA, et al. Multidisciplinary and biodanza intervention for the management of fibromyalgia. *Acta Reumatologica Portuguesa* 2012;37(3):240-50. *inappropriate comparison group*
83. Carleton RN, Richter AA, Asmundson GJG. Attention modification in persons with fibromyalgia: A double blind, randomized clinical trial. *Cognitive Behaviour Therapy* 2011;40(4):279-90. doi: 10.1080/16506073.2011.616218 *inappropriate intervention*
84. Carmichael NME, Katz J, Clarke H, et al. An intensive perioperative regimen of pregabalin and celecoxib reduces pain and improves physical function scores six weeks after total hip arthroplasty: A prospective randomized controlled trial. *Pain Research & Management* 2013;18(3):127-32. doi: 10.1155/2013/258714 *inappropriate intervention*
85. Carson JW, Carson KM, Jones KD, et al. A pilot randomized controlled trial of the Yoga of Awareness program in the management of fibromyalgia. *Pain* 2010;151(2):530-9. doi: 10.1016/j.pain.2010.08.020 [published Online First: 2010/10/16] *inappropriate intervention*
86. Carson JW, Carson KM, Jones KD, et al. Follow-up of yoga of awareness for fibromyalgia: results at 3 months and replication in the wait-list group. *The Clinical journal of pain* 2012;28(9):804-13. doi: 10.1097/AJP.0b013e31824549b5 [published Online First: 2012/07/04] *inappropriate study design*
87. Carta MG, Cardia C, Mannu F, et al. The high frequency of manic symptoms in fibromyalgia does influence the choice of treatment? *Clinical Practice and Epidemiology in Mental Health* 2006;2 *inappropriate study design*
88. Casanueva-Fernandez B, Llorca J, Rubio JBI, et al. Efficacy of a multidisciplinary treatment program in patients with severe fibromyalgia. *Rheumatology international* 2012;32(8):2497-502. doi: 10.1007/s00296-011-2045-1 *inappropriate intervention*
89. Castel A, Castro S, Fontova R, et al. Body mass index and response to a multidisciplinary treatment of fibromyalgia. *Rheumatology international* 2015;35(2):303-14. doi: 10.1007/s00296-014-3096-x [published Online First: 2014/08/02] *inappropriate intervention*
90. Castel A, Fontova R, Montull S, et al. Efficacy of a Multidisciplinary Fibromyalgia Treatment Adapted for Women With Low Educational Levels: A Randomized Controlled Trial. *Arthritis care & research* 2013;65(3):421-31. doi: 10.1002/acr.21818 *inappropriate intervention*



91. Castrejon I, Yazici Y, Samuels J, et al. Discordance of global estimates by patients and their physicians in usual care of many rheumatic diseases: association with 5 scores on a Multidimensional Health Assessment Questionnaire (MDHAQ) that are not found on the Health Assessment Questionnaire (HAQ). *Arthritis care & research* 2014;66(6):934-42. doi: 10.1002/acr.22237 [published Online First: 2013/12/05] *inappropriate study design*
92. Castro MMC, Daltro C, Kraychete DC, et al. The cognitive behavioral therapy causes an improvement in quality of life in patients with chronic musculoskeletal pain. *Arquivos De Neuro-Psiquiatria* 2012;70(11):864-68. *inappropriate population*
93. Castro-Sanchez AM, Mataran-Penarrocha GA, Granero-Molina J, et al. Benefits of massage-myofascial release therapy on pain, anxiety, quality of sleep, depression, and quality of life in patients with fibromyalgia. *Evidence-based complementary and alternative medicine : eCAM* 2011;2011:561753. doi: 10.1155/2011/561753 [published Online First: 2011/01/15] *inappropriate intervention*
94. Cedraschi C, Desmeules J, Rapiti E, et al. Fibromyalgia: a randomised, controlled trial of a treatment programme based on self management. *Annals of the rheumatic diseases* 2004; 63(3).  
<http://onlinelibrary.wiley.com/o/cochrane/clcentral/articles/285/CN-00471285/frame.html>. *inappropriate intervention*
95. Celenay ST, Kaya DO, Akbayrak T. Cervical and scapulothoracic stabilization exercises with and without connective tissue massage for chronic mechanical neck pain: A prospective, randomised controlled trial. *Manual therapy* 2016;21:144-50. doi: 10.1016/j.math.2015.07.003 *inappropriate intervention*
96. Cella M, Sharpe M, Chalder T. Measuring disability in patients with chronic fatigue syndrome: reliability and validity of the Work and Social Adjustment Scale. *Journal of psychosomatic research* 2011;71(3):124-8. doi: 10.1016/j.jpsychores.2011.02.009 [published Online First: 2011/08/17] *inappropriate population*
97. Chatzitheodorou D, Mavromoustakos S, Milioti S. The effect of exercise on adrenocortical responsiveness of patients with chronic low back pain, controlled for psychological strain. *Clinical Rehabilitation* 2008;22(4):319-28. doi: 10.1177/0269215507079858 *inappropriate population*
98. Chen KW, Perlman A, Liao JG, et al. Effects of external qigong therapy on osteoarthritis of the knee. A randomized controlled trial. *Clinical rheumatology* 2008;27(12):1497-505. doi: 10.1007/s10067-008-0955-4 [published Online First: 2008/07/26] *inappropriate intervention*
99. Cheung C, Wyman J, Bronas U, et al. Is yoga better than aerobic/strengthening exercises for managing knee osteoarthritis in older adults? *Osteoarthritis and cartilage* 2016; 24.  
<http://onlinelibrary.wiley.com/o/cochrane/clcentral/articles/579/CN-01142579/frame.html>. *inappropriate study design*
100. Christensen R, Henriksen M, Leeds A, et al. Effect of weight maintenance on symptoms of knee osteoarthritis in obese patients: a twelve-month randomized controlled trial. *Arthritis care & research* 2015; 67(5).

- <http://onlinelibrary.wiley.com/o/cochrane/clcentral/articles/664/CN-01075664/frame.html>. *inappropriate outcomes*
101. Christensen SS, Frostholt L, Ørnbøl E, et al. Changes in illness perceptions mediated the effect of cognitive behavioural therapy in severe functional somatic syndromes. *Journal of psychosomatic research* 2015;78(4):363-70. doi: 10.1016/j.jpsychores.2014.12.005 *inappropriate study design*
  102. Citrome L, Weiss-Citrome A. A systematic review of duloxetine for osteoarthritic pain: What is the number needed to treat, number needed to harm, and likelihood to be helped or harmed? *Postgraduate Medicine* 2012;124(1):83-93. doi: 10.3810/pgm.2012.01.2521 *inappropriate study design*
  103. Clark DI, Downing N, Mitchell J, et al. Physiotherapy for anterior knee pain: a randomised controlled trial. *Annals of the rheumatic diseases* 2000;59(9):700-04. doi: 10.1136/ard.59.9.700 *inappropriate population*
  104. Clarke-Jenssen A-C, Mengshoel AM, Staalesen Strumse Y, et al. EFFECT OF A FIBROMYALGIA REHABILITATION PROGRAMME IN WARM VERSUS COLD CLIMATE: A RANDOMIZED CONTROLLED STUDY. *Journal of Rehabilitation Medicine (Stiftelsen Rehabiliteringsinformation)* 2014;46(7):676-83. doi: 10.2340/16501977-1819 *inappropriate intervention*
  105. Cordoba-Torrecilla S, Aparicio VA, Soriano-Maldonado A, et al. Physical fitness is associated with anxiety levels in women with fibromyalgia: the al-Andalus project. *Quality of Life Research* 2016;25(4):1053-58. doi: 10.1007/s11136-015-1128-y *inappropriate study design*
  106. Cöster L, Kendall S, Gerdle B, et al. Chronic widespread musculoskeletal pain--A comparison of those who meet criteria for fibromyalgia and those who do not. *European Journal of Pain* 2008;12(5):600-10. doi: 10.1016/j.ejpain.2007.10.001 *inappropriate study design*
  107. Courtois I, Cools F, Calsius J. Effectiveness of body awareness interventions in fibromyalgia and chronic fatigue syndrome: a systematic review and meta-analysis. *Journal of bodywork and movement therapies* 2015;19(1):35-56. doi: 10.1016/j.jbmt.2014.04.003 [published Online First: 2015/01/22] *inappropriate study design*
  108. Couto CI. Exercise training and pyridostigmine each have unique benefits for patients with fibromyalgia. *Australian Journal of Physiotherapy* 2008;54(3):219-19. *inappropriate study design*
  109. Creavin ST, Dunn KM, Mallen CD, et al. Co-occurrence and associations of pain and fatigue in a community sample of Dutch adults. *European Journal of Pain* 2010;14(3):327-34. doi: 10.1016/j.ejpain.2009.05.010 *inappropriate study design*
  110. Cuesta-Vargas A, Luciano JV, Peñarrubia-María MT, et al. Clinical dimensions of fibromyalgia symptoms and development of a combined index of severity: The CODI index. *Quality of Life Research: An International Journal of Quality of Life Aspects of Treatment, Care & Rehabilitation* 2013;22(1):153-60. doi: 10.1007/s11136-012-0134-6 *inappropriate study design*
  111. Cuss A, Morris M, Ambler N, et al. Goal setting for managing rheumatoid arthritis fatigue: A qualitative exploration. *Rheumatology Conference: Rheumatology 2010 - British Society for Rheumatology, BSR and British Health Professionals in Rheumatology, BHPR Annual Meeting 2010 Birmingham United Kingdom*

Conference Start: 20100420 Conference End: 20100423 Conference Publication: (varpagings) 2010; 49.

<http://onlinelibrary.wiley.com/doi/10.1002/art.1790110607> *inappropriate study design*

112. Dailey DL, Frey LA, Vance CG, et al. Perceived function and physical performance are associated with pain and fatigue in women with fibromyalgia. *Arthritis research & therapy* 2016;18:68. doi: 10.1186/s13075-016-0954-9 [published Online First: 2015/01/01] *inappropriate study design*
113. Daltroy LH, Morlino CI, Eaton HM, et al. Preoperative education for total hip and knee replacement patients. *Arthritis care & research* 1998;11(6):469-78. doi: 10.1002/art.1790110607 *inappropriate intervention*
114. das Nair R, Anderson P, Clarke S, et al. Home-administered pre-surgical psychological intervention for knee osteoarthritis (HAPPiKNEES): study protocol for a randomised controlled trial. *Trials* 2016;17:54. doi: 10.1186/s13063-016-1165-z [published Online First: 2016/01/29] *inappropriate intervention*
115. Davis MC, Zautra AJ, Wolf LD, et al. Mindfulness and cognitive-behavioral interventions for chronic pain: Differential effects on daily pain reactivity and stress reactivity. *Journal of Consulting and Clinical Psychology* 2015;83(1):24-35. doi: 10.1037/a0038200 *inappropriate intervention*
116. de Brouwer SJM, Kraaimaat FW, Sweep F, et al. Psychophysiological Responses to Stress after Stress Management Training in Patients with Rheumatoid Arthritis. *PloS one* 2011;6(12) doi: 10.1371/journal.pone.0027432 *inappropriate intervention*
117. D'Eon MS. Feasibility and Acceptability of Graded In-Vivo Exposure Therapy for Fibromyalgia Patients [Ph.D.]. University of California, San Diego, 2016. *inappropriate intervention*
118. Donmez A, Karagulle MZ, Tercan N, et al. SPA therapy in fibromyalgia: a randomised controlled clinic study. *Rheumatology international* 2005;26(2):168-72. doi: 10.1007/s00296-005-0623-9 [published Online First: 2005/06/21] *inappropriate intervention*
119. Dougados M, Tsai WC, Saaibi DL, et al. Evaluation of Health Outcomes with Etanercept Treatment in Patients with Early Nonradiographic Axial Spondyloarthritis. *The Journal of rheumatology* 2015;42(10):1835-41. doi: 10.3899/jrheum.141313 [published Online First: 2015/08/16] *inappropriate intervention*
120. Driban JB, Morgan N, Price LL, et al. Patient-Reported Outcomes Measurement Information System (PROMIS) instruments among individuals with symptomatic knee osteoarthritis: a cross-sectional study of floor/ceiling effects and construct validity. *BMC musculoskeletal disorders* 2015;16 doi: 10.1186/s12891-015-0715-y *inappropriate study design*
121. Dunn-Lewis C, Kraemer WJ, Kupchak BR, et al. A multi-nutrient supplement reduced markers of inflammation and improved physical performance in active individuals of middle to older age: a randomized, double-blind, placebo-controlled study. *Nutrition Journal* 2011;10 doi: 10.1186/1475-2891-10-90 *inappropriate intervention*

122. Ekici G, Bakar Y, Akbayrak T, et al. Comparison of manual lymph drainage therapy and connective tissue massage in women with fibromyalgia: a randomized controlled trial. *Journal of manipulative and physiological therapeutics* 2009;32(2):127-33. doi: 10.1016/j.jmpt.2008.12.001 [published Online First: 2009/02/27] *inappropriate intervention*
123. Ekici G, Unal E, Akbayrak T, et al. Effects of active/passive interventions on pain, anxiety, and quality of life in women with fibromyalgia: Randomized controlled pilot trial. *Women & health* 2017;57(1):88-107. doi: 10.1080/03630242.2016.1153017 [published Online First: 2016/02/18] *inappropriate comparison group*
124. Ekici G, Unal E, Akbayrak T, et al. Active versus passive therapy in females with fibromyalgia; "pilates exercises and connective tissue massage": A randomized controlled pilot trial, Fibromiyalji kadınlarda pasif tedaviye karsi aktif tedavi: "pilates egzersizleri ve konnektif doku masajı": Randomize kontrollu pilot calisma. [Turkish, English]. *Fizyoterapi Rehabilitasyon* 2014; 25(1 suppl. 1). <http://onlinelibrary.wiley.com/doi/10.1002/ajm.12141> *inappropriate comparison group*
125. Elias A, Yaacob LH, Kadir AA, et al. Guided Imagery Relaxation Therapy in Malaysian Patients with Knee Osteoarthritis: A Randomized Controlled Trial. *International Journal of Collaborative Research on Internal Medicine & Public Health* 2015;7(5):92-103. *inappropriate intervention*
126. Elliot DL, Kuehl KS, Jones KD, et al. Using an eccentric exercise-testing protocol to assess the beneficial effects of tart cherry juice in fibromyalgia patients. *Integrative Medicine: A Clinician's Journal* 2010;9(6):24-29. *inappropriate intervention*
127. Emery P, Bingham C, Burmester G, et al. Improvements in patient-reported outcomes following 52 weeks of treatment with certolizumab pegol in combination with methotrexate in DMARD-naive patients with severe, active and progressive rheumatoid arthritis: Results from the C-early randomized, double-blind, controlled phase 3 study. *Value in health* 2015; 18(7). <http://onlinelibrary.wiley.com/doi/10.1016/j.jval.2015.05.007> *inappropriate intervention*
128. Engel C. Tailored cognitive-behavioral therapy plus exercise training improved clinical and functional outcomes in fibromyalgia. *Annals of internal medicine* 2011; 154(8). <http://onlinelibrary.wiley.com/doi/10.1093/ajph/101.10.1811> *inappropriate intervention*
129. Ericsson A, Bremell T, Cider A, et al. Effects of exercise on fatigue and physical capacity in men with chronic widespread pain - a pilot study. *Bmc Sports Science Medicine and Rehabilitation* 2016;8 doi: 10.1186/s13102-016-0054-9 *inappropriate population*
130. Ericsson A, Palstam A, Larsson A, et al. Resistance exercise improves physical fatigue in women with fibromyalgia: a randomized controlled trial. *Arthritis research & therapy* 2016;18 doi: 10.1186/s13075-016-1073-3 *inappropriate comparison group*

131. Falcão DM, Sales L, Leite JR, et al. Cognitive behavioral therapy for the treatment of fibromyalgia syndrome: a randomized controlled trial. *Journal of Musculoskeletal Pain* 2008;16(3):133-40. *inappropriate intervention*
132. Fark AR. A pilot study of white-coat and labile hypertension: Associations with diagnoses of psychosocial dysfunction. *Family Practice Research Journal* 1993;13(1):71-80. *inappropriate outcomes*
133. Feldthusen C, Dean E, Forsblad-d'Elia H, et al. Effects of Person-Centered Physical Therapy on Fatigue-Related Variables in Persons With Rheumatoid Arthritis: A Randomized Controlled Trial. *Archives of Physical Medicine & Rehabilitation* 2016;97(1):26-36. *inappropriate intervention*
134. Fenton G, Morley S. A tale of two RCTs: Using randomized controlled trials to benchmark routine clinical (psychological) treatments for chronic pain. *Pain* 2013;154(10):2108-19. doi: 10.1016/j.pain.2013.06.033 *inappropriate study design*
135. Field T. Yoga research review. *Complementary therapies in clinical practice* 2016;24:145-61. doi: 10.1016/j.ctcp.2016.06.005 [published Online First: 2016/08/10] *inappropriate intervention*
136. Field T, Diego M, Cullen C, et al. Fibromyalgia pain and substance P decrease and sleep improves after massage therapy. *Jcr-Journal of Clinical Rheumatology* 2002;8(2):72-76. doi: 10.1097/00124743-200204000-00002 *inappropriate intervention*
137. Field T, Diego M, Delgado J, et al. Rheumatoid arthritis in upper limbs benefits from moderate pressure massage therapy. *Complementary therapies in clinical practice* 2013;19(2):101-3. doi: 10.1016/j.ctcp.2012.12.001 [published Online First: 2013/04/09] *inappropriate intervention*
138. Field T, Hernandez-Reif M, Seligman S, et al. Juvenile rheumatoid arthritis: benefits from massage therapy. *Journal of pediatric psychology* 1997;22(5):607-17. [published Online First: 1998/02/12] *inappropriate population*
139. Fitzgerald GK, White DK, Piva SR. Associations for change in physical and psychological factors and treatment response following exercise in knee osteoarthritis: an exploratory study. *Arthritis care & research* 2012;64(11):1673-80. doi: 10.1002/acr.21751 [published Online First: 2012/06/08] *inappropriate outcomes*
140. Fjorback L, Schroder A, Ornbol E, et al. Mindfulness therapy for bodily distress syndrome - A randomized controlled trial. *Journal of psychosomatic research* 2011; 70(6). <http://onlinelibrary.wiley.com/o/cochrane/clcentral/articles/011/CN-01006011/frame.html>. *inappropriate intervention*
141. Fjorback LO, Arendt M, Ørnbøl E, et al. Mindfulness therapy for somatization disorder and functional somatic syndromes — randomized trial with one-year follow-up. *Journal of psychosomatic research* 2013;74(1):31-40. doi: 10.1016/j.jpsychores.2012.09.006 *inappropriate intervention*
142. Fors EA, Göttestam KG. Patient education, guided imagery and pain related talk in fibromyalgia coping. *The European Journal of Psychiatry* 2000;14(4):233-40. *inappropriate intervention*
143. Fregni F, Gimenes R, Valle AC, et al. A randomized, sham-controlled, proof of principle study of transcranial direct current stimulation for the treatment of pain

- in fibromyalgia. *Arthritis and rheumatism* 2006;54(12):3988-98. doi: 10.1002/art.22195 [published Online First: 2006/11/30] *inappropriate intervention*
144. French H, Cusack T, Brennan A, et al. The effectiveness of exercise with and without manual therapy for hip osteoarthritis: A multi-centre randomised controlled trial. *Arthritis and rheumatism* 2011; 63(10 suppl. 1). <http://onlinelibrary.wiley.com/o/cochrane/clcentral/articles/130/CN-01005130/frame.html>. *inappropriate study design*
145. French H, Cusack T, Brennan A, et al. The effectiveness of exercise therapy with and without manual therapy for hip osteoarthritis: A multicentre randomised controlled trial. *Rheumatology* 2011; 50. <http://onlinelibrary.wiley.com/o/cochrane/clcentral/articles/722/CN-01003722/frame.html>. *inappropriate study design*
146. French HP, Cusack T, Brennan A, et al. Exercise and manual physiotherapy arthritis research trial (EMPART): a multicentre randomised controlled trial. *BMC musculoskeletal disorders* 2009;10:9. doi: 10.1186/1471-2474-10-9 [published Online First: 2009/01/21] *inappropriate study design*
147. French HP, Galvin R, Cusack T, et al. Predictors of short-term outcome to exercise and manual therapy for people with hip osteoarthritis. *Physical therapy* 2014;94(1):31-9. doi: 10.2522/ptj.20130173 [published Online First: 2013/08/10] *inappropriate study design*
148. Friedrich M, Hahne J, Wepner F. A controlled examination of medical and psychosocial factors associated with low back pain in combination with widespread musculoskeletal pain. *Physical therapy* 2009;89(8):786-803. doi: 10.2522/ptj.20080100 [published Online First: 2009/06/23] *inappropriate population*
149. Fulton AS, Hill AM, Williams MT, et al. Feasibility of omega-3 fatty acid supplementation as an adjunct therapy for people with chronic obstructive pulmonary disease: study protocol for a randomized controlled trial. *Trials* 2013;14 doi: 10.1186/1468-6708-14-107 *inappropriate intervention*
150. Garcia-Campayo J, Pascual A, Alda M, et al. Coping with fibromyalgia: Usefulness of the Chronic Pain Coping Inventory-42. *Pain* 2007;132(Suppl 1):S68-S76. doi: 10.1016/j.pain.2007.02.013 *inappropriate intervention*
151. Garcia-Palacios A, Herrero R, Vizcaino Y, et al. Integrating Virtual Reality With Activity Management for the Treatment of Fibromyalgia Acceptability and Preliminary Efficacy. *Clinical Journal of Pain* 2015;31(6):564-72. doi: 10.1097/ajp.000000000000196 *inappropriate intervention*
152. Garvey WT, Mechanick JI, Brett EM, et al. AMERICAN ASSOCIATION OF CLINICAL ENDOCRINOLOGISTS AND AMERICAN COLLEGE OF ENDOCRINOLOGY COMPREHENSIVE CLINICAL PRACTICE GUIDELINES FOR MEDICAL CARE OF PATIENTS WITH OBESITY. *Endocrine practice : official journal of the American College of Endocrinology and the American Association of Clinical Endocrinologists* 2016;22 Suppl 3:1-203. doi: 10.4158/ep161365.gl [published Online First: 2016/05/25] *inappropriate study design*

153. Gavi M, Vassalo DV, Amaral FT, et al. Strengthening Exercises Improve Symptoms and Quality of Life but Do Not Change Autonomic Modulation in Fibromyalgia: A Randomized Clinical Trial. *PloS one* 2014;9(3) doi: 10.1371/journal.pone.0090767 *inappropriate comparison group*
154. Genc A, Tur BS, Aytur YK, et al. Does aerobic exercise affect the hypothalamic-pituitary-adrenal hormonal response in patients with fibromyalgia syndrome? *Journal of Physical Therapy Science* 2015;27(7):2225-31. *inappropriate outcomes*
155. Gerskowitch C, Norman I, Rimes KA. Patients with medically unexplained physical symptoms experience of receiving treatment in a primary-care psychological therapies service: a qualitative study. *Cognitive Behaviour Therapist* 2015;8 doi: 10.1017/s1352465815000235 *inappropriate intervention*
156. Gniadecki R, Robertson D, Molta CT, et al. Self-reported health outcomes in patients with psoriasis and psoriatic arthritis randomized to two etanercept regimens. *Journal of the European Academy of Dermatology and Venereology : JEADV* 2012;26(11):1436-43. doi: 10.1111/j.1468-3083.2011.04308.x <http://dx.doi.org/10.1111/j.1468-3083.2011.04308.x> [published Online First: 2011/11/01] *inappropriate intervention*
157. Goodwin P, Al QK, Gregory W, et al. The effectiveness of aquatic physiotherapy in patients with rheumatoid arthritis: A randomised controlled trial. *Physiotherapy (United Kingdom)* 2015; 101. <http://onlinelibrary.wiley.com/doi/10.1111/j.1468-3083.2011.04308.x> *inappropriate comparison group*
158. Gowans SE, DeHueck A, Abbey SE. Measuring exercise-induced mood changes in fibromyalgia: a comparison of several measures. *Arthritis and rheumatism* 2002;47(6):603-9. doi: 10.1002/art.10789 [published Online First: 2003/01/11] *inappropriate population*
159. Gowans SE, Dehueck A, Voss S, et al. Six-month and one-year followup of 23 weeks of aerobic exercise for individuals with fibromyalgia. *Arthritis and rheumatism* 2004;51(6):890-8. doi: 10.1002/art.20828 [published Online First: 2004/12/14] *inappropriate population*
160. Grace SL, Krepostman S, Brooks D, et al. Illness perceptions among cardiac patients: Relation to depressive symptomatology and sex. *Journal of psychosomatic research* 2005;59(3):153-60. doi: 10.1016/j.jpsychores.2005.05.005 *inappropriate study design*
161. Gremeaux V, Durand S, Benaim C, et al. Evaluation of various ways to deliver information concerning non-steroidal anti-inflammatory drugs to osteoarthritis patients. *Annals of physical and rehabilitation medicine* 2013;56(1):14-29. doi: 10.1016/j.rehab.2012.12.004 [published Online First: 2013/02/02] *inappropriate study design*
162. Gronning K, Bratas O, Steinsbekk A. Which Factors Influence Self-Efficacy in Patients with Chronic Inflammatory Polyarthritis? *Musculoskeletal care* 2016;14(2):77-86. doi: 10.1002/msc.1114 *inappropriate study design*
163. Gronning K, Rannestad T, Skomsvoll JF, et al. Long-term effects of a nurse-led group and individual patient education programme for patients with chronic inflammatory polyarthritis - a randomised controlled trial. *Journal of clinical*

- nursing* 2014;23(7-8):1005-17. doi: 10.1111/jocn.12353 [published Online First: 2013/07/24] *inappropriate intervention*
164. Gronning K, Skomsvoll JF, Rannestad T, et al. The effect of an educational programme consisting of group and individual arthritis education for patients with polyarthritis-A randomised controlled trial. *Patient education and counseling* 2012;88(1):113-20. doi: 10.1016/j.pec.2011.12.011 *inappropriate intervention*
165. Gulec H, Capkin E, Sayar K, et al. The evaluation of the effectiveness of amitriptyline versus venlafaxine in female patients diagnosed with fibromyalgia syndrome. [Turkish]. *Klinik Psikofarmakoloji Bulteni* 2007; 17(2). <http://onlinelibrary.wiley.com/o/cochrane/clcentral/articles/184/CN-00642184/frame.html>. *inappropriate intervention*
166. Gusi N, Tomas-Carus P, Hakkinen A, et al. Exercise in waist-high warm water decreases pain and improves health-related quality of life and strength in the lower extremities in women with fibromyalgia. *Arthritis and rheumatism* 2006;55(1):66-73. doi: 10.1002/art.21718 *inappropriate population*
167. Haak T, Scott B. The effect of Qigong on fibromyalgia (FMS): a controlled randomized study. *DisabilRehabil* 2008;30(8):625-33. *inappropriate intervention*
168. Haugstad GK, Haugstad TS, Kirste UM, et al. Continuing improvement of chronic pelvic pain in women after short-term Mensendieck somatocognitive therapy: results of a 1-year follow-up study. *American Journal of Obstetrics and Gynecology* 2008;199(6) doi: 10.1016/j.ajog.2008.06.019 *inappropriate population*
169. Haun JN, Graham-Pole J, Shortley B. Children with cancer and blood diseases experience positive physical and psychological effects from massage therapy. *International journal of therapeutic massage & bodywork* 2009;2(2):7-14. [published Online First: 2009/01/01] *inappropriate population*
170. Haupt M, Millen S, Janner M, et al. Improvement of coping abilities in patients with systemic lupus erythematosus: a prospective study. *Annals of the rheumatic diseases* 2005;64(11):1618-23. doi: 10.1136/ard.2004.029926 *inappropriate population*
171. Hauser W. The german fibromyalgia consumer reports-a cross-sectional survey. *Annals of the Rheumatic Disease* 2013; 71. <http://onlinelibrary.wiley.com/o/cochrane/clcentral/articles/601/CN-01011601/frame.html>. *inappropriate study design*
172. Hecker CD, Melo C, Tomazoni SdS, et al. Analysis of effects of kinesiotherapy and hidrokinestiotherapy on the quality of patients with fibromyalgia -- a randomized clinical trial. *Fisioterapia em Movimento* 2011;24(1):57-64. doi: 10.1590/S0103-51502011000100007 *inappropriate comparison group*
173. Heffez DS, Ross RE, Shade-Zeldow Y, et al. Treatment of cervical myelopathy in patients with the fibromyalgia syndrome: outcomes and implications. *European spine journal : official publication of the European Spine Society, the European Spinal Deformity Society, and the European Section of the Cervical Spine Research Society* 2007;16(9):1423-33. doi: 10.1007/s00586-007-0366-2 [published Online First: 2007/04/12] *inappropriate study design*



174. Henkel K, Reimers CD, Knapp G, et al. Physical training for neurological and mental diseases. *Der Nervenarzt* 2014;85(12):1521-+. doi: 10.1007/s00115-013-3978-2 *inappropriate study design*
175. Hoeger Bement MK, Weyer A, Hartley S, et al. Pain Perception After Isometric Exercise in Women With Fibromyalgia. *Archives of Physical Medicine & Rehabilitation* 2011;92(1):89-95. *inappropriate study design*
176. Hsieh RL, Lee WC. Clinical effects of lateral wedge arch support insoles in knee osteoarthritis: A prospective double-blind randomized study. *Medicine* 2016;95(27):e3952. doi: 10.1097/md.0000000000003952 [published Online First: 2016/07/12] *inappropriate intervention*
177. Hsieh RL, Lo MT, Lee WC, et al. Therapeutic effects of short-term monochromatic infrared energy therapy on patients with knee osteoarthritis: a double-blind, randomized, placebo-controlled study. *The Journal of orthopaedic and sports physical therapy* 2012;42(11):947-56. doi: 10.2519/jospt.2012.3881 [published Online First: 2012/09/11] *inappropriate intervention*
178. Huber E, Roos E, Meichtry A, et al. Effect of preoperative neuromuscular training (NEMEX-TJR) on functional outcome after total knee replacement: An assessor-blinded randomized controlled trial. *BMC musculoskeletal disorders* 2015; 16(1). <http://onlinelibrary.wiley.com/o/cochrane/clcentral/articles/584/CN-01088584/frame.html>. *inappropriate intervention*
179. Hudson JI, Arnold LM, Bradley LA, et al. What makes patients with fibromyalgia feel better? Correlations between Patient Global Impression of Improvement and changes in clinical symptoms and function: a pooled analysis of 4 randomized placebo-controlled trials of duloxetine. *The Journal of rheumatology* 2009;36(11):2517-22. doi: 10.3899/jrheum.090139 [published Online First: 2009/10/17] *inappropriate study design*
180. Hughes S, Seymour R, Campbell R, et al. Fit and Strong!: bolstering maintenance of physical activity among older adults with lower-extremity osteoarthritis. *American journal of health behavior* 2010; 34(6). <http://onlinelibrary.wiley.com/o/cochrane/clcentral/articles/647/CN-00761647/frame.html>. *inappropriate intervention*
181. Hurley M, Walsh N, Jessep S. Clinical effectiveness and costs of an integrated rehabilitation programme compared with outpatient physiotherapy for chronic knee pain. *Arthritis and rheumatism* 2012; 64. <http://onlinelibrary.wiley.com/o/cochrane/clcentral/articles/235/CN-01008235/frame.html>. *inappropriate study design*
182. Hurst NP, Lambert CM, Forbes J, et al. Does waiting matter? A randomized controlled trial of new non-urgent rheumatology out-patient referrals. *Rheumatology (Oxford, England)* 2000;39(4):369-76. [published Online First: 2000/05/19] *inappropriate intervention*
183. Ide MR, Laurindo IMM, Rodrigues AL, et al. Effect of aquatic respiratory exercise-based program in patients with fibromyalgia. *International journal of rheumatic diseases* 2008;11(2):131-40. doi: 10.1111/j.1756-185X.2008.00348.x *inappropriate comparison group*
184. Jackel WH, Gerdes N, Cziske R, et al. RHEUMATIC COMPLAINTS IN THE GENERAL-POPULATION OF GERMANY - PREVALENCE, PHYSICAL AND

- PSYCHOSOCIAL IMPACT. *Zeitschrift fur Rheumatologie* 1993;52(5):281-88.  
*inappropriate study design*
185. Jenkinson CM, Doherty M, Avery AJ, et al. Effects of dietary intervention and quadriceps strengthening exercises on pain and function in overweight people with knee pain: randomised controlled trial. *BMJ (Clinical research ed)* 2009;339:b3170. doi: 10.1136/bmj.b3170 [published Online First: 2009/08/20]  
*inappropriate population*
  186. Jensen KB, Kosek E, Wicksell R, et al. Cognitive Behavioral Therapy increases pain-evoked activation of the prefrontal cortex in patients with fibromyalgia. *Pain* 2012;153(7):1495-503. doi: 10.1016/j.pain.2012.04.010  
*inappropriate intervention*
  187. Jensen OK, Nielsen CV, Stengaard-Pedersen K. One-year prognosis in sick-listed low back pain patients with and without radiculopathy. Prognostic factors influencing pain and disability. *Spine Journal* 2010;10(8):659-75. doi: 10.1016/j.spinee.2010.03.026  
*inappropriate population*
  188. Jessep SA, Walsh NE, Ratcliffe J, et al. Long-term clinical benefits and costs of an integrated rehabilitation programme compared with outpatient physiotherapy for chronic knee pain. *Physiotherapy* 2009;95(2):94-102. doi: 10.1016/j.physio.2009.01.005 [published Online First: 2009/07/25]  
*inappropriate population*
  189. Johannesson E, Simren M, Strid H, et al. Physical activity improves symptoms in irritable bowel syndrome: a randomized controlled trial. *The American journal of gastroenterology* 2011;106(5):915-22. doi: 10.1038/ajg.2010.480 [published Online First: 2011/01/06]  
*inappropriate population*
  190. Jones KD. A randomized controlled trial of muscle strengthening versus flexibility training in fibromyalgia. Microform Publications, University of Oregon, 2000.  
*inappropriate comparison group*
  191. Kamanli A, Kaya A, Ardicoglu O, et al. Comparison of lidocaine injection, botulinum toxin injection, and dry needling to trigger points in myofascial pain syndrome. *Rheumatology international* 2005;25(8):604-11. doi: 10.1007/s00296-004-0485-6  
*inappropriate intervention*
  192. Kang J, Li N, Wu B. Therapeutic methods for knee osteoarthritis: Randomized controlled trial and systemic evaluation. [Chinese]. *Zhongguo Linchuang Kangfu* 2005; 9(30). <http://onlinelibrary.wiley.com/o/cochrane/clcentral/articles/890/CN-00643890/frame.html>.  
*inappropriate study design*
  193. Kapfhammer HP. [Psychopharmacological treatment in patients with somatoform disorders and functional body syndromes]. *Der Nervenarzt* 2012;83(9):1128-41. doi: 10.1007/s00115-011-3446-9 [published Online First: 2012/08/17]  
*inappropriate study design*
  194. Karp J, Dew M, Wahed A, et al. Challenges and Solutions for Depression Prevention Research: Methodology for a Depression Prevention Trial for Older Adults with Knee Arthritis and Emotional Distress. *American journal of geriatric psychiatry* 2016; 24(6). <http://onlinelibrary.wiley.com/o/cochrane/clcentral/articles/456/CN-01158456/frame.html>.  
*inappropriate outcomes*

195. Katic B, Heywood J, Turek F, et al. New approach for analyzing self-reporting of insomnia symptoms reveals a high rate of comorbid insomnia across a wide spectrum of chronic diseases. *Sleep Medicine* 2015;16(11):1332-41. doi: 10.1016/j.sleep.2015.07.024 *inappropriate outcomes*
196. Kaya A, Kamanli A, Ardicoglu O, et al. Direct current therapy with/without fidocaine iontophoresis in myofascial pain syndrome. *Bratislava Medical Journal- Bratislavske Lekarske Listy* 2009;110(3):185-91. *inappropriate intervention*
197. Kayiran S, Dursun E, Dursun N, et al. Neurofeedback intervention in fibromyalgia syndrome; a randomized, controlled, rater blind clinical trial. *Applied psychophysiology and biofeedback* 2010;35(4):293-302. doi: 10.1007/s10484-010-9135-9 [published Online First: 2010/07/09] *inappropriate intervention*
198. Keefe FJ, Shelby RA, Somers TJ, et al. Effects of coping skills training and sertraline in patients with non-cardiac chest pain: A randomized controlled study. *Pain* 2011;152(4):730-41. doi: 10.1016/j.pain.2010.08.040 *inappropriate intervention*
199. Keeley T, Al-Janabi H, Nicholls E, et al. A longitudinal assessment of the responsiveness of the ICECAP-A in a randomised controlled trial of a knee pain intervention. *Quality of life research : an international journal of quality of life aspects of treatment, care and rehabilitation* 2015;24(10):2319-31. doi: 10.1007/s11136-015-0980-0 [published Online First: 2015/04/22] *inappropriate study design*
200. Kekow J, Moots R, Khandker R, et al. Improvements in patient-reported outcomes, symptoms of depression and anxiety, and their association with clinical remission among patients with moderate-to-severe active early rheumatoid arthritis. *Rheumatology (Oxford, England)* 2011;50(2):401-9. doi: 10.1093/rheumatology/keq327 [published Online First: 2010/11/10] *inappropriate study design*
201. Kekow J, Moots RJ, Emery P, et al. Patient-reported outcomes improve with etanercept plus methotrexate in active early rheumatoid arthritis and the improvement is strongly associated with remission: the COMET trial. *Annals of the rheumatic diseases* 2010;69(1):222-5. doi: 10.1136/ard.2008.102509 [published Online First: 2009/03/19] *inappropriate intervention*
202. Kempke S, Goossens L, Luyten P, et al. Predictors of outcome in a multi-component treatment program for chronic fatigue syndrome. *Journal of Affective Disorders* 2010;126(1-2):174-79. doi: 10.1016/j.jad.2010.01.073 *inappropriate intervention*
203. Knittle K, Maes S, de Gucht V. Psychological interventions for rheumatoid arthritis: examining the role of self-regulation with a systematic review and meta-analysis of randomized controlled trials. *Arthritis care & research* 2010;62(10):1460-72. doi: 10.1002/acr.20251  
<http://dx.doi.org/10.1002/acr.20251> [published Online First: 2010/05/28] *inappropriate study design*
204. Kolahi S, Pourghassem Gargari B, Mesgari Abbasi M, et al. Effects of phylloquinone supplementation on lipid profile in women with rheumatoid arthritis: a double blind placebo controlled study. *Nutrition research and practice*

- 2015;9(2):186-91. doi: 10.4162/nrp.2015.9.2.186 [published Online First: 2015/04/11] *inappropriate intervention*
205. Konuk N, Ortancil O, Bostanci B, et al. A comparison of reboxetine and amitryptilline in the treatment of fibromyalgia syndrome with co-morbid depressive symptoms: An open-label preliminary study. *Klinik Psikofarmakoloji Bülteni / Bulletin of Clinical Psychopharmacology* 2010;20(1):29-37. *inappropriate intervention*
206. Koullil S, Lankveld W, Kraaimaat F, et al. Tailored cognitive-behavioral therapy and exercise training for high-risk patients with fibromyalgia. *Arthritis care & research* 2010; 62(10).  
<http://onlinelibrary.wiley.com/o/cochrane/clcentral/articles/899/CN-00760899/frame.html>. *inappropriate intervention*
207. Kravitz HM, Esty ML, Katz RS, et al. Treatment of fibromyalgia syndrome using low-intensity neurofeedback with the Flexyx Neurotherapy System: a randomized controlled clinical trial. *Journal of Neurotherapy* 2006;10(2/3):41-58. *inappropriate intervention*
208. Kwakkenbos L, Willems LM, van den Hoogen FHJ, et al. Cognitive-Behavioural Therapy Targeting Fear of Progression in an Interdisciplinary Care Program: A Case Study in Systemic Sclerosis. *Journal of Clinical Psychology in Medical Settings* 2014;21(4):297-312. doi: 10.1007/s10880-014-9414-3 *inappropriate study design*
209. Lakhani SE, Schofield KL. Mindfulness-based therapies in the treatment of somatization disorders: a systematic review and meta-analysis. *PloS one* 2013;8(8):e71834. doi: 10.1371/journal.pone.0071834 [published Online First: 2013/08/31] *inappropriate study design*
210. Lan CC, Tseng CH, Chen JH, et al. Increased risk of a suicide event in patients with primary fibromyalgia and in fibromyalgia patients with concomitant comorbidities A nationwide population-based cohort study. *Medicine* 2016;95(44) doi: 10.1097/md.0000000000005187 *inappropriate study design*
211. Lange M, Krohn-Grimberghe B, Petermann F. Medium-term effects of a multimodal therapy on patients with fibromyalgia. Results of a controlled efficacy study. *Schmerz* 2011;25(1):55-61. doi: 10.1007/s00482-010-1003-2 *inappropriate intervention*
212. Lelieveld O, Armbrust W, Geertzen J, et al. Promoting physical activity in children with juvenile idiopathic arthritis through an internet-based program: Results of a pilot randomised controlled trial. *Physiotherapy (United Kingdom)* 2011; 97.  
<http://onlinelibrary.wiley.com/o/cochrane/clcentral/articles/266/CN-01076266/frame.html>. *inappropriate population*
213. Leombruni P, Miniotti M, Colonna F, et al. A randomised controlled trial comparing duloxetine and acetyl L-carnitine in fibromyalgic patients: preliminary data. *Clinical and experimental rheumatology* 2015;33(1 Suppl 88):S82-5. [published Online First: 2015/03/19] *inappropriate intervention*
214. Leon AAC, Morera M, Espinoza MB, et al. Case Study: Effect of a Physical Exercise and Nutritional Counseling Program on Physical and Psychological Variables in a Person with Fibromyalgia. *Mhsalud-Revista En Ciencias Del*

- Movimiento Humano Y La Salud* 2015;11(2):1-19. doi: 10.15359/mhs.11-2.1  
*inappropriate study design*
215. Li K, Hu XQ, Qiu WH, et al. Effects of physiotherapy versus combination of physiotherapy and preventive education on quality of life in patients with degenerative gonarthrosis. *Chinese Journal of Clinical Rehabilitation* 2006;10(4):32-33. *inappropriate intervention*
216. Li YH, Wang FY, Feng CQ, et al. Massage therapy for fibromyalgia: a systematic review and meta-analysis of randomized controlled trials. *PloS one* 2014;9(2):e89304. doi: 10.1371/journal.pone.0089304 [published Online First: 2014/03/04] *inappropriate study design*
217. Ljótsson B, Atterlöf E, Lagerlöf M, et al. Internet-delivered acceptance and values-based exposure treatment for fibromyalgia: A pilot study. *Cognitive Behaviour Therapy* 2014;43(2):93-104. doi: 10.1080/16506073.2013.846401 *inappropriate intervention*
218. Lopez-Pousa S, Bassets Pages G, Monserrat-Vila S, et al. Sense of Well-Being in Patients with Fibromyalgia: Aerobic Exercise Program in a Mature Forest-A Pilot Study. *Evidence-based complementary and alternative medicine : eCAM* 2015;2015:614783. doi: 10.1155/2015/614783 [published Online First: 2015/11/12] *inappropriate comparison group*
219. Lopez-Rodriguez MD, Castro-Sanchez AM, Fernandez-Martinez M, et al. Comparison between aquatic-biodanza and stretching for improving quality of life and pain in patients with fibromyalgia. *Atencion Primaria* 2012;44(11):641-49. doi: 10.1016/j.aprim.2012.03.002 *inappropriate intervention*
220. Lopez-Rodriguez MM, Fernandez-Martinez M, Mataran-Penarrocha GA, et al. [Effectiveness of aquatic biodance on sleep quality, anxiety and other symptoms in patients with fibromyalgia]. *Medicina clinica* 2013;141(11):471-8. doi: 10.1016/j.medcli.2012.09.036 [published Online First: 2012/12/19] *inappropriate intervention*
221. Luciano JV, Martinez N, Penarrubia-Maria MT, et al. Effectiveness of a psychoeducational treatment program implemented in general practice for fibromyalgia patients: a randomized controlled trial. *The Clinical journal of pain* 2011;27(5):383-91. doi: 10.1097/AJP.0b013e31820b131c [published Online First: 2011/02/15] *inappropriate intervention*
222. Luedtke K, Rushton A, Wright C, et al. Effectiveness of anodal transcranial direct current stimulation in patients with chronic low back pain: design, method and protocol for a randomised controlled trial. *BMC musculoskeletal disorders* 2011;12:290. doi: 10.1186/1471-2474-12-290 [published Online First: 2011/12/30] *inappropriate intervention*
223. Lumley M, Schubiner H, Clauw D, et al. The PAST-FM (Pain and Stress Treatment for Fibromyalgia) randomized, controlled trial: Main effects of emotional awareness and expression and cognitive-behavioral therapies. *Journal of pain* 2016; 17(4 suppl. 1).  
<http://onlinelibrary.wiley.com/o/cochrane/clcentral/articles/566/CN-01142566/frame.html>. *inappropriate intervention*
224. Lumley MA, Keefe FJ, Mosley-Williams A, et al. The effects of written emotional disclosure and coping skills training in rheumatoid arthritis: A randomized clinical

- trial. *Journal of Consulting and Clinical Psychology* 2014;82(4):644-58. doi: 10.1037/a0036958 *inappropriate intervention*
225. Lund I, Lundeberg T, Carleson J, et al. Corticotropin releasing factor in urine--a possible biochemical marker of fibromyalgia. Responses to massage and guided relaxation. *Neuroscience letters* 2006;403(1-2):166-71. doi: 10.1016/j.neulet.2006.04.038 [published Online First: 2006/05/24] *inappropriate study design*
226. Mackintosh S. Hydrotherapy and Tai Chi each provide clinical improvements for older people with osteoarthritis. *Australian Journal of Physiotherapy* 2008;54(2):143-43. *inappropriate study design*
227. Maddali Bongji S, Del Rosso A, Di Felice C, et al. Resseguier method and Qi Gong sequentially integrated in patients with fibromyalgia syndrome. *Clinical and experimental rheumatology* 2012;30(6 Suppl 74):51-8. [published Online First: 2012/11/01] *inappropriate intervention*
228. Mahagna H, Amital D, Amital H. A randomised, double-blinded study comparing giving etoricoxib vs. placebo to female patients with fibromyalgia. *International journal of clinical practice* 2016; 70(2 // (MSD) \*Meso Scale Diagnostics\*). <http://onlinelibrary.wiley.com/doi/10.1111/ijcp.12727> *inappropriate intervention*
229. Mannerkorpi K, Nyberg B, Ahlmen M, et al. Pool exercise combined with an education program for patients with fibromyalgia syndrome. A prospective, randomized study. *J Rheumatol* 2000;27(10):2473-81. *inappropriate intervention*
230. Mao JJ, Bruner DW, Stricker C, et al. Feasibility trial of electroacupuncture for aromatase inhibitor--related arthralgia in breast cancer survivors. *Integrative cancer therapies* 2009;8(2):123-9. doi: 10.1177/1534735409332903 [published Online First: 2009/08/15] *inappropriate population*
231. Marszalek J, Price LL, Harvey WF, et al. Outcome Expectations and Osteoarthritis: Perceived Benefits of Exercise Are Associated with Self-Efficacy and Depression. *Arthritis care & research* 2016 doi: 10.1002/acr.22969 [published Online First: 2016/07/09] *inappropriate study design*
232. Martin DP, Williams BA, Berger IH. Improvement in fibromyalgia symptoms with acupuncture: Results of a randomized controlled trial. *Mayo Clinic proceedings* 2006;81(6):749-57. *inappropriate intervention*
233. Martín J, Torre F, Aguirre U, et al. Evaluation of the interdisciplinary PSYMEPHY treatment on patients with fibromyalgia: A randomized control trial. *Pain Medicine* 2014;15(4):682-91. doi: 10.1111/pme.12375 *inappropriate intervention*
234. Martín J, Torre F, Padierna A, et al. Six-and 12-month follow-up of an interdisciplinary fibromyalgia treatment programme: results of a randomised trial. *Clinical and experimental rheumatology* 2012;30(6 Suppl 74):103-11. [published Online First: 2013/02/27] *inappropriate intervention*
235. Martín J, Torre F, Padierna A, et al. Interdisciplinary treatment of patients with fibromyalgia: improvement of their health-related quality of life. *Pain practice : the official journal of World Institute of Pain* 2014; 14(8). <http://onlinelibrary.wiley.com/doi/10.1111/ppa.12272> *inappropriate intervention*

236. Martin J, Torre F, Padierna A, et al. Impact of interdisciplinary treatment on physical and psychosocial parameters in patients with fibromyalgia: results of a randomised trial. *International journal of clinical practice* 2014;68(5):618-27. [published Online First: 2014/05/29] *inappropriate intervention*
237. Martín-Nogueras AM, Calvo-Arenillas JI. Efficacy of physiotherapy treatment on pain and quality of life in patients with fibromyalgia. *Rehabilitacion* 2012;46(3):199-206. *inappropriate intervention*
238. Martins MRI, Gritti CC, dos Santos R, et al. Randomized controlled trial of a therapeutic intervention group in patients with fibromyalgia syndrome. *Revista Brasileira De Reumatologia* 2014;54(3):179-84. doi: 10.1016/j.rbre.2013.10.002 *inappropriate intervention*
239. Mata J, Cabrera S, Sanchis P, et al. Electro-acupuncture for treatment of knee pain from osteoarthritis and the possible endocrinology changes: a study protocol for a randomized controlled trial. *Trials* 2015;16:248. doi: 10.1186/s13063-015-0766-2 [published Online First: 2015/06/04] *inappropriate study design*
240. Mataran-Penarrocha GA, Castro-Sanchez AM, Garcia GC, et al. Influence of Craniosacral Therapy on Anxiety, Depression and Quality of Life in Patients with Fibromyalgia. *Evidence-Based Complementary and Alternative Medicine* 2011:1-9. doi: 10.1093/ecam/nep125 *inappropriate intervention*
241. Matcham F, Norton S, Scott D, et al. The impact of depression on long-term physical health outcomes in rheumatoid arthritis. *Rheumatology (United Kingdom)* 2014; 53.  
<http://onlinelibrary.wiley.com/o/cochrane/clcentral/articles/273/CN-01057273/frame.html>. *inappropriate study design*
242. Matcham F, Norton S, Scott DL, et al. Symptoms of depression and anxiety predict treatment response and long-term physical health outcomes in rheumatoid arthritis: secondary analysis of a randomized controlled trial. *Rheumatology (Oxford, England)* 2016;55(2):268-78. doi: 10.1093/rheumatology/kev306 [published Online First: 2015/09/10] *inappropriate study design*
243. McBain H, Shipley M, Olaleye A, et al. A patient-initiated DMARD self-monitoring service for people with rheumatoid or psoriatic arthritis on methotrexate: A randomised controlled trial. *Annals of the rheumatic diseases* 2016; 75(7).  
<http://onlinelibrary.wiley.com/o/cochrane/clcentral/articles/299/CN-01178299/frame.html>. *inappropriate intervention*
244. McVeigh JG, Hurley DA, Basford JR, et al. Effectiveness of a combined pool-based exercise and education programme compared to usual medical care in fibromyalgia syndrome: a randomised, controlled trial. *Physical Therapy Reviews* 2006;11(3):217-17. *inappropriate study design*
245. Mendonca ME, Simis M, Grecco LC, et al. Transcranial Direct Current Stimulation Combined with Aerobic Exercise to Optimize Analgesic Responses in Fibromyalgia: A Randomized Placebo-Controlled Clinical Trial. *Frontiers in human neuroscience* 2016;10:68. doi: 10.3389/fnhum.2016.00068 [published Online First: 2016/03/26] *inappropriate intervention*
246. Menkes CJ, Godeau P. Fibromyalgia. *Bulletin De L Academie Nationale De Medecine* 2007;191(1):143-48. *inappropriate study design*

247. Mercadie L, Mick G, Guetin S, et al. Effects of Listening to Music versus Environmental Sounds in Passive and Active Situations on Levels of Pain and Fatigue in Fibromyalgia. *Pain Management Nursing* 2015;16(5):664-71. doi: 10.1016/j.pmn.2015.01.005 *inappropriate intervention*
248. Meyer BB, Lemley KJ. Utilizing exercise to affect the symptomology of fibromyalgia: a pilot study. *Medicine and science in sports and exercise* 2000;32(10):1691-7. [published Online First: 2000/10/20] *inappropriate study design*
249. Mibielli M, Nunes C, Cezar P, et al. Osteoarthritis: Clinical evaluation of diclofenac combined with the B complex vitamins. *Revista brasileira de medicina* 2009; 66(7). <http://onlinelibrary.wiley.com/o/cochrane/clcentral/articles/674/CN-00753674/frame.html>. *inappropriate intervention*
250. Middleton KR, Ward MM, Haaz S, et al. A pilot study of yoga as self-care for arthritis in minority communities. *Health and quality of life outcomes* 2013;11:55. doi: 10.1186/1477-7525-11-55 [published Online First: 2013/04/04] *inappropriate intervention*
251. Miles ALS. The effects of gentle yoga vs. cognitive behavioral therapy on physical and psychological symptoms; neurocognitive functioning; and physiology in women with Fibromyalgia. ProQuest Information & Learning, 2014. *inappropriate intervention*
252. Minor MA. Exercise maintenance behavior of subjects with arthritis following participation in a supervised exercise program [Ph.D.]. University of Missouri - Columbia, 1989. *inappropriate study design*
253. Minor MA, Brown JD. Exercise maintenance of persons with arthritis after participation in a class experience. *Health education quarterly* 1993;20(1):83-95. [published Online First: 1993/01/01] *inappropriate study design*
254. Mirtaheri E, Gargari BP, Kolahi S, et al. Effects of Alpha-Lipoic Acid Supplementation on Inflammatory Biomarkers and Matrix Metalloproteinase-3 in Rheumatoid Arthritis Patients. *Journal of the American College of Nutrition* 2015;34(4):310-17. doi: 10.1080/07315724.2014.910740 *inappropriate intervention*
255. Mishra P, Trivedi V. Acupuncture in the treatment of rheumatoid arthritis: Results of a randomized controlled trial. *Annals of the rheumatic diseases* 2014; 73. <http://onlinelibrary.wiley.com/o/cochrane/clcentral/articles/582/CN-01009582/frame.html>. *inappropriate intervention*
256. Moore RA, Straube S, Paine J, et al. Fibromyalgia: Moderate and substantial pain intensity reduction predicts improvement in other outcomes and substantial quality of life gain. *Pain* 2010;149(2):360-64. doi: 10.1016/j.pain.2010.02.039 *inappropriate study design*
257. Morgan N, Driban J, Ransford G, et al. Construct validity of promis instruments among patients with symptomatic knee osteoarthritis. *Osteoarthritis and cartilage* 2013; 21. <http://onlinelibrary.wiley.com/o/cochrane/clcentral/articles/483/CN-01010483/frame.html>. *inappropriate study design*
258. Morgan N, Ransford G, Morgan L, et al. Mindfulness is associated with psychological symptoms, self-efficacy, and quality of life among patients with symptomatic knee osteoarthritis. *Osteoarthritis and cartilage* 2013; 21.



- <http://onlinelibrary.wiley.com/o/cochrane/clcentral/articles/479/CN-01010479/frame.html>. *inappropriate study design*
259. Morone N, Karp J, Lynch C, et al. Impact of chronic musculoskeletal pathology on older adults: a study of differences between knee OA and low back pain. *Pain medicine (Malden, Mass)* 2009; 10(4).  
<http://onlinelibrary.wiley.com/o/cochrane/clcentral/articles/087/CN-00721087/frame.html>. *inappropriate study design*
260. Moroshko I, Brennan L, O'Brien P. Predictors of dropout in weight loss interventions: A systematic review of the literature. *Obesity Reviews* 2011;12(11):912-34. doi: 10.1111/j.1467-789X.2011.00915.x *inappropriate study design*
261. Morris LD, Grimmer-Somers KA, Spottiswoode B, et al. Virtual reality exposure therapy as treatment for pain catastrophizing in fibromyalgia patients: proof-of-concept study (Study Protocol). *BMC musculoskeletal disorders* 2011;12(1):85. doi: 10.1186/1471-2474-12-85 [published Online First: 2011/05/03] *inappropriate study design*
262. Moustafa IM, Diab AA. The addition of upper cervical manipulative therapy in the treatment of patients with fibromyalgia: a randomized controlled trial. *Rheumatology international* 2015;35(7):1163-74. doi: 10.1007/s00296-015-3248-7 [published Online First: 2015/03/19] *inappropriate intervention*
263. Mu PF, Chen YC, Cheng SC. The effectiveness of non-pharmacological pain management in relieving chronic pain for children and adolescents. *JBI library of systematic reviews* 2009;7(34):1489-543. [published Online First: 2009/01/01] *inappropriate population*
264. Munguia-Izquierdo D, Legaz-Arrese A. Determinants of sleep quality in middle-aged women with fibromyalgia syndrome. *Journal of Sleep Research* 2012;21(1):73-79. doi: 10.1111/j.1365-2869.2011.00929.x *inappropriate outcomes*
265. Murphy LB, Sacks JJ, Brady TJ, et al. Anxiety and depression among US adults with arthritis: Prevalence and correlates. *Arthritis care & research* 2012;64(7):968-76. doi: 10.1002/acr.21685 *inappropriate study design*
266. Murphy SL, Lyden AK, Kratz AL, et al. Characterizing Pain Flares From the Perspective of Individuals With Symptomatic Knee Osteoarthritis. *Arthritis care & research* 2015;67(8):1103-11. doi: 10.1002/acr.22545 *inappropriate study design*
267. Nalamachu S, Rauck R, Hale M, et al. A long-term, open-label safety study of single-entity hydrocodone bitartrate extended release for the treatment of moderate to severe chronic pain. *Journal of pain research* 2014; 7.  
<http://onlinelibrary.wiley.com/o/cochrane/clcentral/articles/077/CN-01036077/frame.html>. *inappropriate intervention*
268. Navarrete-Navarrete N, Peralta-Ramirez MI, Sabio-Sanchez JM, et al. Efficacy of Cognitive Behavioural Therapy for the Treatment of Chronic Stress in Patients with Lupus Erythematosus: A Randomized Controlled Trial. *Psychotherapy and Psychosomatics* 2010;79(2):107-15. doi: 10.1159/000276370 *inappropriate population*
269. Nazareth I, Landau S, Yardley L, et al. Patterns of presentations of dizziness in primary care - a cross-sectional cluster analysis study. *Journal of psychosomatic*

- research* 2006;60(4):395-401. doi: 10.1016/j.jpsychores.2005.07.011  
*inappropriate study design*
270. Niedermann K, de Bie RA, Kubli R, et al. Effectiveness of individual resource-oriented joint protection education in people with rheumatoid arthritis. A randomized controlled trial. *Patient education and counseling* 2011;82(1):42-48. doi: 10.1016/j.pec.2010.02.014 *inappropriate intervention*
271. Noiseux NO, Callaghan JJ, Clark CR, et al. Preoperative predictors of pain following total knee arthroplasty. *The Journal of arthroplasty* 2014;29(7):1383-7. doi: 10.1016/j.arth.2014.01.034 [published Online First: 2014/03/19]  
*inappropriate study design*
272. Noppers I, Niesters M, Swartjes M, et al. Absence of long-term analgesic effect from a short-term S-ketamine infusion on fibromyalgia pain: A randomized, prospective, double blind, active placebo-controlled trial. *European Journal of Pain* 2011;15(9):942-49. doi: 10.1016/j.ejpain.2011.03.008 *inappropriate intervention*
273. Nordeman L, Gunnarsson R, Mannerkorpi K. Prevalence and Characteristics of Widespread Pain in Female Primary Health Care Patients With Chronic Low Back Pain. *Clinical Journal of Pain* 2012;28(1):65-72. doi: 10.1097/AJP.0b013e318223622c *inappropriate population*
274. Nugraha B, Korallus C, Dorffer D, et al. Aerobic exercise cognitive behavioural therapy and combination of treatment in fibromyalgia syndrome patients: A randomized control trial (effect on mood related disorder-a preliminary result). *PM and R* 2014; 6(8 suppl. 2).  
<http://onlinelibrary.wiley.com/o/cochrane/clcentral/articles/639/CN-01086639/frame.html>. *inappropriate study design*
275. Nyssen OP, Taylor SJC, Wong G, et al. Does therapeutic writing help people with long-term conditions? Systematic review, realist synthesis and economic considerations. *Health Technology Assessment* 2016;20(27):1-367. doi: 10.3310/hta20270 *inappropriate study design*
276. Ohta H, Oka H, Usui C, et al. A randomized, double-blind, multicenter, placebo-controlled phase III trial to evaluate the efficacy and safety of pregabalin in Japanese patients with fibromyalgia. *Arthritis research & therapy* 2012; 14(5).  
<http://onlinelibrary.wiley.com/o/cochrane/clcentral/articles/489/CN-00913489/frame.html>. *inappropriate intervention*
277. Oktayoglu P, Gur A, Yardimeden I, et al. Comparison of the efficacy of phonophoresis and conventional ultrasound therapy in patients with primary knee osteoarthritis. *Erciyes Tip Dergisi* 2014; 36(1).  
<http://onlinelibrary.wiley.com/o/cochrane/clcentral/articles/055/CN-00988055/frame.html>. *inappropriate intervention*
278. Olin R, Klein R, Berg PA. A randomised double-blind 16-week study of ritanserin in fibromyalgia syndrome: clinical outcome and analysis of autoantibodies to serotonin, gangliosides and phospholipids. *Clinical rheumatology* 1998;17(2):89-94. [published Online First: 1998/06/26] *inappropriate intervention*
279. Olivan-Blázquez B, Herrera-Mercadal P, Puebla-Guedea M, et al. Efficacy of memantine in the treatment of fibromyalgia: A double-blind, randomised,

- controlled trial with 6-month follow-up. *Pain* 2014;155(12):2517-25. doi: 10.1016/j.pain.2014.09.004 *inappropriate intervention*
280. O'Mathúna DP. Exercise Programs Help Reduce Anxiety in Patients with Chronic Illnesses. *Alternative Medicine Alert* 2010;13(4):43-44. *inappropriate study design*
281. O'Reilly SC, Muir KR, Doherty M. Effectiveness of home exercise on pain and disability from osteoarthritis of the knee: a randomised controlled trial. *Annals of the rheumatic diseases* 1999;58(1):15-19. *inappropriate population*
282. Oren YK. Effectiveness of Mindfulness-Based Stress Reduction Bibliotherapy [Ph.D.]. University of Nevada, Reno, 2015. *inappropriate intervention*
283. Osteras H, Osteras B, Torstensen TA. Is postoperative exercise therapy necessary in patients with degenerative meniscus? A randomized controlled trial with one year follow-up. *Knee surgery, sports traumatology, arthroscopy : official journal of the ESSKA* 2014;22(1):200-6. doi: 10.1007/s00167-012-2354-2 [published Online First: 2012/12/25] *inappropriate population*
284. Osteras H, Torstensen T, Selven E, et al. High dosage medical exercise therapy or arthroscopic treatment for patients with degenerative meniscus injury: A pilot study. *Physiotherapy (United Kingdom)* 2011; 97. <http://onlinelibrary.wiley.com/doi/10.1111/j.1469-7610.2011.02474.x> *inappropriate population*
285. Ottaviani S, Bernard JL, Bardin T, et al. Effect of music on anxiety and pain during joint lavage for knee osteoarthritis. *Clinical rheumatology* 2012;31(3):531-4. doi: 10.1007/s10067-011-1925-9 [published Online First: 2011/12/31] *inappropriate intervention*
286. Packham JC, Jordan KP, Haywood KL, et al. Evaluation of Ankylosing Spondylitis Quality of Life questionnaire: responsiveness of a new patient-reported outcome measure. *Rheumatology (Oxford, England)* 2012;51(4):707-14. doi: 10.1093/rheumatology/ker377 [published Online First: 2011/12/20] *inappropriate population*
287. Pae C-U, Masand PS, Marks DM, et al. History of depressive and/or anxiety disorders as a predictor of treatment response: A post hoc analysis of a 12-week, randomized, double-blind, placebo-controlled trial of paroxetine controlled release in patients with fibromyalgia. *Progress in Neuro-Psychopharmacology & Biological Psychiatry* 2009;33(6):996-1002. doi: 10.1016/j.pnpbp.2009.05.005 *inappropriate intervention*
288. Papadopoulou D, Fassoulaki A, Tsoulas C, et al. A meta-analysis to determine the effect of pharmacological and non-pharmacological treatments on fibromyalgia symptoms comprising OMERACT-10 response criteria. *Clinical rheumatology* 2016;35(3):573-86. doi: 10.1007/s10067-015-3144-2 [published Online First: 2015/12/18] *inappropriate study design*
289. Passard A, Attal N, Benadhira R, et al. Effects of unilateral repetitive transcranial magnetic stimulation of the motor cortex on chronic widespread pain in fibromyalgia. *Brain: A Journal of Neurology* 2007;130(10):2661-70. doi: 10.1093/brain/awm189 *inappropriate intervention*
290. Pedersen BK, Saltin B. Exercise as medicine - evidence for prescribing exercise as therapy in 26 different chronic diseases. *Scandinavian Journal of Medicine &*

- Science in Sports* 2015;25:1-72. doi: 10.1111/sms.12581 *inappropriate study design*
291. Peres M. Fibromyalgia and headache disorders. *Current pain and headache reports* 2009; 13(5).  
<http://onlinelibrary.wiley.com/o/cochrane/clcentral/articles/879/CN-00958879/frame.html>. *inappropriate study design*
292. Perrot S, Russell IJ. More ubiquitous effects from non-pharmacologic than from pharmacologic treatments for fibromyalgia syndrome: a meta-analysis examining six core symptoms. *European journal of pain (London, England)* 2014;18(8):1067-80. doi: 10.1002/ejp.564 [published Online First: 2014/08/21] *inappropriate study design*
293. Peters S, Stanley I, Rose M, et al. A randomized controlled trial of group aerobic exercise in primary care patients with persistent, unexplained physical symptoms. *Family Practice* 2002;19(6):665-74. doi: 10.1093/fampra/19.6.665 *inappropriate population*
294. Potvin S, Morin M, Cloutier C, et al. Add-on treatment of quetiapine for fibromyalgia: A pilot, randomized, double-blind, placebo-controlled 12-week trial. *Journal of Clinical Psychopharmacology* 2012;32(5):684-87. doi: 10.1097/JCP.0b013e318267b8ca *inappropriate intervention*
295. Preece JC. The relationship between family resilience and the successful management of fibromyalgia [Ph.D.]. Syracuse University, 2001. *inappropriate study design*
296. Rakel B, Zimmerman M, Geasland K, et al. Transcutaneous electrical nerve stimulation for the control of pain during rehabilitation after total knee arthroplasty: A randomized, blinded, placebo-controlled trial. *Pain* 2014; 155(12).  
<http://onlinelibrary.wiley.com/o/cochrane/clcentral/articles/744/CN-01052744/frame.html>. *inappropriate intervention*
297. Redondo JR, Justo CM, Moraleda FV, et al. Long-term efficacy of therapy in patients with fibromyalgia: a physical exercise-based program and a cognitive-behavioral approach. *Arthritis and rheumatism* 2004;51(2):184-92. doi: 10.1002/art.20252 [published Online First: 2004/04/13] *inappropriate comparison group*
298. Richards DA, Hill JJ, Gask L, et al. Clinical effectiveness of collaborative care for depression in UK primary care (CADET): Cluster randomised controlled trial. *BMJ: British Medical Journal* 2013;347 *inappropriate population*
299. Rini C, Porter LS, Somers TJ, et al. Automated Internet-based pain coping skills training to manage osteoarthritis pain: a randomized controlled trial. *Pain* 2015;156(5):837-48. doi: 10.1097/j.pain.000000000000121 [published Online First: 2015/03/04] *inappropriate intervention*
300. Rodriguez Huerta MD, Trujillo-Martin MM, Rua-Figueroa I, et al. Healthy lifestyle habits for patients with systemic lupus erythematosus: A systemic review. *Seminars in arthritis and rheumatism* 2016;45(4):463-70. doi: 10.1016/j.semarthrit.2015.09.003 [published Online First: 2015/11/03] *inappropriate population*
301. Rodriguez Torres J, Cabrera Martos I, Torres Sanchez I, et al. Results of an Active Neurodynamic Mobilization Program in Patients With Fibromyalgia

- Syndrome: A Randomized Controlled Trial. *Archives of Physical Medicine & Rehabilitation* 2015;96(10):1771-78. *inappropriate intervention*
302. Romero-Zurita A, Carbonell-Baeza A, Aparicio VA, et al. Effectiveness of a Tai-Chi Training and Detraining on Functional Capacity, Symptomatology and Psychological Outcomes in Women with Fibromyalgia. *Evidence-Based Complementary and Alternative Medicine* 2012 doi: 10.1155/2012/614196 *inappropriate intervention*
303. Rouse P, Duda J, Veldhuijzen VZJ, et al. Feelings of competence and relatedness during physical activity are related to well-being in rheumatoid arthritis patients: Preliminary findings from a randomized control trial. *Annals of the rheumatic diseases* 2013; 72. <http://onlinelibrary.wiley.com/doi/10.1111/annrheumdis.12111>. *inappropriate study design*
304. Rouse PC, Van Zanten J, Ntoumanis N, et al. Measuring the positive psychological wellbeing of people with rheumatoid arthritis: a cross-sectional validation of the subjective vitality scale. *Arthritis research & therapy* 2015;17 doi: 10.1186/s13075-015-0827-7 *inappropriate study design*
305. Russek LN, LaShomb EA, Ware AM, et al. United States Physical Therapists' Knowledge About Joint Hypermobility Syndrome Compared with Fibromyalgia and Rheumatoid Arthritis. *Physiotherapy research international : the journal for researchers and clinicians in physical therapy* 2016;21(1):22-35. doi: 10.1002/pri.1613 [published Online First: 2014/12/17] *inappropriate study design*
306. Russell IJ, Holman AJ, Swick TJ, et al. Sodium oxybate reduces pain, fatigue, and sleep disturbance and improves functionality in fibromyalgia: results from a 14-week, randomized, double-blind, placebo-controlled study. *Pain* 2011;152(5):1007-17. doi: 10.1016/j.pain.2010.12.022 [published Online First: 2011/03/15] *inappropriate intervention*
307. Rybarczyk B, DeMarco G, Delacruz M, et al. Comparing mind-body wellness interventions for older adults with chronic illness: Classroom versus home instruction. *Behavioral Medicine* 1999;24(4):181-90. *inappropriate intervention*
308. Sancheti P, Hardikar M, Karne N, et al. A multicentric, randomized, comparative clinical trial to evaluate the efficacy and safety of S-etodolac in the treatment of osteoarthritis in Indian patients. *International journal of clinical pharmacology and therapeutics* 2010;48(7):429-34. [published Online First: 2010/06/19] *inappropriate intervention*
309. Schanberg LE, Anthony KK, Gil KM, et al. Daily pain and symptoms in children with polyarticular arthritis. *Arthritis and rheumatism* 2003;48(5):1390-7. doi: 10.1002/art.10986 [published Online First: 2003/05/15] *inappropriate population*
310. Scheidt CE, Waller E, Endorf K, et al. Is brief psychodynamic psychotherapy in primary fibromyalgia syndrome with concurrent depression an effective treatment? A randomized controlled trial. *General Hospital Psychiatry* 2013;35(2):160-67. doi: 10.1016/j.genhosppsych.2012.10.013 *inappropriate intervention*
311. Schmale GA, Mazor S, Mercer LD, et al. Lack of Benefit of Physical Therapy on Function Following Supracondylar Humeral Fracture A Randomized Controlled

- Trial. *Journal of Bone and Joint Surgery-American Volume* 2014;96A(11):944-50. doi: 10.2106/jbjs.l.01696 *inappropriate population*
312. Schmidt S, Grossman P, Schwarzer B, et al. Treating fibromyalgia with mindfulness-based stress reduction: results from a 3-armed randomized controlled trial. *Pain* 2011;152(2):361-9. doi: 10.1016/j.pain.2010.10.043 [published Online First: 2010/12/15] *inappropriate intervention*
  313. Scopaz KA, Piva SR, Wisniewski S, et al. Relationships of Fear, Anxiety, and Depression With Physical Function in Patients With Knee Osteoarthritis. *Archives of physical medicine and rehabilitation* 2009;90(11):1866-73. doi: 10.1016/j.apmr.2009.06.012 *inappropriate study design*
  314. Selfridge N. Meditation for Fibromyalgia: Yea or Nay? *Alternative Medicine Alert* 2011;14(3):34-36. *inappropriate intervention*
  315. Shadick NA, Sowell NF, Frits ML, et al. A randomized controlled trial of an internal family systems-based psychotherapeutic intervention on outcomes in rheumatoid arthritis: a proof-of-concept study. *The Journal of rheumatology* 2013;40(11):1831-41. doi: 10.3899/jrheum.121465 [published Online First: 2013/08/21] *inappropriate intervention*
  316. Shahabi L, Naliboff BD, Shapiro D. Self-regulation evaluation of therapeutic yoga and walking for patients with irritable bowel syndrome: a pilot study. *Psychology Health & Medicine* 2016;21(2):176-88. doi: 10.1080/13548506.2015.1051557 *inappropriate population*
  317. Shahrbanian S, Duquette P, Kuspinar A, et al. Contribution of symptom clusters to multiple sclerosis consequences. *Quality of Life Research* 2015;24(3):617-29. doi: 10.1007/s11136-014-0804-7 *inappropriate population*
  318. Sharpe L, Gittins CB, Correia HM, et al. Problem-solving versus cognitive restructuring of medically ill seniors with depression (PROMISE-D trial): study protocol and design. *Bmc Psychiatry* 2012;12 doi: 10.1186/1471-244x-12-207 *inappropriate study design*
  319. Sharpe L, Sensky T, Allard S. The course of depression in recent onset rheumatoid arthritis: the predictive role of disability, illness perceptions, pain and coping. *Journal of psychosomatic research* 2001;51(6):713-9. [published Online First: 2001/12/26] *inappropriate study design*
  320. Sharpe L, Sensky T, Timberlake N, et al. Long-term efficacy of a cognitive behavioural treatment from a randomized controlled trial for patients recently diagnosed with rheumatoid arthritis. *Rheumatology (Oxford, England)* 2003; 42(3). <http://onlinelibrary.wiley.com/o/cochrane/clcentral/articles/463/CN-00431463/frame.html>. *inappropriate intervention*
  321. Sharpe L, Sensky T, Timberlake N, et al. A blind, randomized, controlled trial of cognitive-behavioural intervention for patients with recent onset rheumatoid arthritis: preventing psychological and physical morbidity. *Pain* 2001; 89(2-3). <http://onlinelibrary.wiley.com/o/cochrane/clcentral/articles/279/CN-00327279/frame.html>. *inappropriate intervention*
  322. Shih M, Hootman JM, Kruger J, et al. Physical activity in men and women with arthritis - National Health Interview Survey, 2002. *American Journal of Preventive Medicine* 2006;30(5):385-93. doi: 10.1016/j.amepre.2005.12.005 *inappropriate intervention*

323. Shupak NM, McKay JC, Nielson WR, et al. Exposure to a specific pulsed low-frequency magnetic field: A double-blind placebo-controlled study of effects on pain ratings in rheumatoid arthritis and fibromyalgia patients. *Pain Research & Management* 2006;11(2):85-90. doi: 10.1155/2006/842162 *inappropriate intervention*
324. Siegel KM. The effects of emotional disclosure on physical symptoms, healthcare utilization, and psychosocial adjustment in patients with irritable bowel syndrome [Ph.D.]. Alliant International University, San Diego, 2003. *inappropriate population*
325. Skrabek RQ, Galimova L, Ethans K, et al. Nabilone for the treatment of pain in fibromyalgia. *The journal of pain : official journal of the American Pain Society* 2008;9(2):164-73. doi: 10.1016/j.jpain.2007.09.002 [published Online First: 2007/11/03] *inappropriate intervention*
326. Slavich GM, Irwin MR. From Stress to Inflammation and Major Depressive Disorder: A Social Signal Transduction Theory of Depression. *Psychological Bulletin* 2014;140(3):774-815. doi: 10.1037/a0035302 *inappropriate study design*
327. Smeets RJ, Maher CG, Nicholas MK, et al. Do psychological characteristics predict response to exercise and advice for subacute low back pain? *Arthritis and rheumatism* 2009;61(9):1202-9. doi: 10.1002/art.24731 [published Online First: 2009/08/29] *inappropriate study design*
328. Smith-Ray R, Fitzgibbon M, Tussing-Humphreys L, et al. Fit and Strong! Plus: Design of a comparative effectiveness evaluation of a weight management program for older adults with osteoarthritis. *Contemporary clinical trials* 2014; 37(2). <http://onlinelibrary.wiley.com/o/cochrane/clcentral/articles/212/CN-00959212/frame.html>. *inappropriate study design*
329. Sörensen J, Bengtsson A, Ahlner J, et al. Fibromyalgia--are there different mechanisms in the processing of pain? A double blind crossover comparison of analgesic drugs. *The Journal of rheumatology* 1997; 24(8). <http://onlinelibrary.wiley.com/o/cochrane/clcentral/articles/709/CN-00142709/frame.html>. *inappropriate intervention*
330. Stehlik R, Ulfberg J, Hedner J, et al. High prevalence of restless legs syndrome among women with multi-site pain: A population-based study in Dalarna, Sweden. *European Journal of Pain* 2014;18(10):1402-09. doi: 10.1002/ejp.504 *inappropriate outcomes*
331. Stiller C. The effect of therapeutic touch on fibromyalgia pain and anxiety [Ph.D.]. Case Western Reserve University (Health Sciences), 2006. *inappropriate intervention*
332. Stratz T, Mennet P, Benn H, et al. [Blocking of S2 receptors--a new treatment principle in generalized tendomyopathy (fibromyalgia)?]. *Zeitschrift fur Rheumatologie* 1991; 50(1). <http://onlinelibrary.wiley.com/o/cochrane/clcentral/articles/788/CN-00353788/frame.html>. *inappropriate intervention*
333. Sulenes K, Freitas J, Justice L, et al. Underuse of Yoga as a Referral Resource by Health Professions Students. *Journal of Alternative and Complementary Medicine* 2015;21(1):53-59. doi: 10.1089/acm.2014.0217 *inappropriate intervention*

334. Sutbeyaz S, Sezer N, Koseoglu F, et al. Low-frequency pulsed electromagnetic field therapy in fibromyalgia: a randomized, double-blind, sham-controlled clinical study. *The Clinical journal of pain* 2009; 25(8).  
<http://onlinelibrary.wiley.com/o/cochrane/clcentral/articles/605/CN-00728605/frame.html>. *inappropriate intervention*
335. Sverdrup B. Use less cosmetics--suffer less from fibromyalgia? *Journal of women's health (2002)* 2004; 13(2).  
<http://onlinelibrary.wiley.com/o/cochrane/clcentral/articles/706/CN-00468706/frame.html>. *inappropriate intervention*
336. Tang NK, Lereya ST, Boulton H, et al. Nonpharmacological Treatments of Insomnia for Long-Term Painful Conditions: A Systematic Review and Meta-analysis of Patient-Reported Outcomes in Randomized Controlled Trials. *Sleep* 2015;38(11):1751-64. doi: 10.5665/sleep.5158 [published Online First: 2015/04/24] *inappropriate study design*
337. Tang NKY, Goodchild CE, Salkovskis PM. Hybrid cognitive-behaviour therapy for individuals with insomnia and chronic pain: A pilot randomised controlled trial. *Behaviour Research and Therapy* 2012;50(12):814-21. doi: 10.1016/j.brat.2012.08.006 *inappropriate population*
338. Tarakci E, Yeldan I, Kaya Mutlu E, et al. The relationship between physical activity level, anxiety, depression, and functional ability in children and adolescents with juvenile idiopathic arthritis. *Clinical rheumatology* 2011;30(11):1415-20. doi: 10.1007/s10067-011-1832-0 [published Online First: 2011/09/03] *inappropriate population*
339. Teunis T, Thornton ER, Guitton TG, et al. Coaching of patients with an isolated minimally displaced fracture of the radial head immediately increases range of motion. *Journal of Hand Therapy* 2016;29(3):314-19. doi: 10.1016/j.jht.2016.02.003 *inappropriate population*
340. Thomas K, Muir K, Doherty M, et al. Home based exercise programme for knee pain and knee osteoarthritis: randomised controlled trial. *BMJ (Clinical research ed)* 2002; 325(7367).  
<http://onlinelibrary.wiley.com/o/cochrane/clcentral/articles/283/CN-00398283/frame.html>. *inappropriate population*
341. Tonkins WP, Jr. Effect of Hatha yoga on selected parameters of cardiac fitness in African-American college students [Dr.P.H.]. Morgan State University, 2004.  
*inappropriate intervention*
342. Torres JR, Martos IC, Sanchez IT, et al. Results of an Active Neurodynamic Mobilization Program in Patients With Fibromyalgia Syndrome: A Randomized Controlled Trial. *Archives of physical medicine and rehabilitation* 2015;96(10):1771-8. doi: 10.1016/j.apmr.2015.06.008 [published Online First: 2015/07/06] *inappropriate intervention*
343. Torres X, Herrero MJ, Marti M, et al. Why people with fibromyalgia persist in activity despite the increasing pain? A Delphi Study of the content of the Clinic Scale of Persistence in Activity in Fibromyalgia. *Revista De Psiquiatria Y Salud Mental* 2013;6(1):33-44. doi: 10.1016/j.rpsm.2012.03.001 *inappropriate study design*



344. Toth C, Brady S, Gagnon F, et al. A Randomized, Single-Blind, Controlled, Parallel Assignment Study of Exercise Versus Education as Adjuvant in the Treatment of Peripheral Neuropathic Pain. *Clinical Journal of Pain* 2014;30(2):111-18. doi: 10.1097/AJP.0b013e31828ccd0f *inappropriate population*
345. Tousignant-Laflamme Y, Bourgault P, Masetto A, et al. Short term impact of brief education for symptom management in fibromyalgia-the PEGASO study. *Journal of pain* 2014; 15(4 suppl. 1).  
<http://onlinelibrary.wiley.com/o/cochrane/clcentral/articles/679/CN-01058679/frame.html>. *inappropriate intervention*
346. Trudeau KJ, Pujol LA, DasMahapatra P, et al. A randomized controlled trial of an online self-management program for adults with arthritis pain. *Journal of Behavioral Medicine* 2015;38(3):483-96. doi: 10.1007/s10865-015-9622-9 *inappropriate intervention*
347. Uceyler N, Hauser W, Sommer C. A systematic review on the effectiveness of treatment with antidepressants in fibromyalgia syndrome. *Arthritis Care and Research* 2008; 59(9).  
<http://onlinelibrary.wiley.com/o/cochrane/clcentral/articles/590/CN-00898590/frame.html>. *inappropriate study design*
348. Ulus Y, Tander B, Akyol Y, et al. Therapeutic ultrasound versus sham ultrasound for the management of patients with knee osteoarthritis: a randomized double-blind controlled clinical study. *International journal of rheumatic diseases* 2012; 15(2). <http://onlinelibrary.wiley.com/o/cochrane/clcentral/articles/676/CN-00896676/frame.html>. *inappropriate intervention*
349. Vaghef-Mehrabany E, Alipour B, Homayouni-Rad A, et al. Probiotic supplementation improves inflammatory status in patients with rheumatoid arthritis. *Nutrition* 2014;30(4):430-35. doi: 10.1016/j.nut.2013.09.007 *inappropriate intervention*
350. Vaghef-Mehrabany E, Homayouni-Rad A, Alipour B, et al. Effects of Probiotic Supplementation on Oxidative Stress Indices in Women with Rheumatoid Arthritis: A Randomized Double-Blind Clinical Trial. *Journal of the American College of Nutrition* 2016;35(4):291-99. *inappropriate intervention*
351. Valencia M, Alonso B, Alvarez M, et al. Effects of 2 physiotherapy programs on pain perception, muscular flexibility, and illness impact in women with fibromyalgia: a pilot study. *Journal of manipulative and physiological therapeutics* 2009; 32(1). <http://onlinelibrary.wiley.com/o/cochrane/clcentral/articles/935/CN-00680935/frame.html>. *inappropriate comparison group*
352. Valim V, Oliveira L, Suda A, et al. Aerobic fitness effects in fibromyalgia. *The Journal of rheumatology* 2003;30(5):1060-9. [published Online First: 2003/05/08] *inappropriate intervention*
353. Vallejo MA, Ortega J, Rivera J, et al. Internet versus face-to-face group cognitive-behavioral therapy for fibromyalgia: A randomized control trial. *Journal of Psychiatric Research* 2015;68:106-13. doi: 10.1016/j.jpsychires.2015.06.006 *inappropriate intervention*
354. van Koullil S, Kraaimaat FW, van Lankveld W, et al. A patient's perspective on multidisciplinary treatment gain for fibromyalgia: an indicator for pre-post

- treatment effects? *Arthritis and rheumatism* 2009;61(12):1626-32. doi: 10.1002/art.24792 [published Online First: 2009/12/02] *inappropriate study design*
355. van Koulil S, van Lankveld W, Kraaimaat FW, et al. Tailored cognitive-behavioral therapy and exercise training for high-risk patients with fibromyalgia. *Arthritis care & research* 2010;62(10):1377-85. doi: 10.1002/acr.20268 [published Online First: 2010/06/04] *inappropriate intervention*
356. Van Puymbroeck M, Payne LL, Hsieh PC. A phase I feasibility study of yoga on the physical health and coping of informal caregivers. *Evidence-Based Complementary and Alternative Medicine* 2007;4(4):519-29. doi: 10.1093/ecam/nem075 *inappropriate population*
357. van Wilgen CP, Dijkstra PU, Versteegen GJ, et al. CHRONIC PAIN AND SEVERE DISUSE SYNDROME: LONG-TERM OUTCOME OF AN INPATIENT MULTIDISCIPLINARY COGNITIVE BEHAVIOURAL PROGRAMME. *Journal of rehabilitation medicine* 2009;41(3):122-28. doi: 10.2340/16501977-0292 *inappropriate intervention*
358. Vayvay ES, Tok D, Turgut E, et al. The effect of Laser and taping on pain, functional status and quality of life in patients with fibromyalgia syndrome: A placebo- randomized controlled clinical trial. *Journal of back and musculoskeletal rehabilitation* 2016;29(1):77-83. doi: 10.3233/bmr-150600 [published Online First: 2015/09/26] *inappropriate intervention*
359. Vendrig AA, Lousberg R. Within-person relationships among pain intensity, mood and physical activity in chronic pain: a naturalistic approach. *Pain* 1997;73(1):71-76. doi: 10.1016/s0304-3959(97)00075-4 *inappropriate intervention*
360. Vergne-Salle P, Dufauet-Lombard C, Bonnet C, et al. A randomised, double-blind, placebo-controlled trial of dolasetron, a 5-hydroxytryptamine 3 receptor antagonist, in patients with fibromyalgia. *European Journal of Pain* 2011;15(5):509-14. doi: 10.1016/j.ejpain.2010.09.013 *inappropriate intervention*
361. Verra ML, Angst F, Beck T, et al. Horticultural therapy for patients with chronic musculoskeletal pain: results of a pilot study. *Alternative therapies in health and medicine* 2012;18(2):44-50. [published Online First: 2012/04/21] *inappropriate study design*
362. Verra ML, Angst F, Brioschi R, et al. Does classification of persons with fibromyalgia into Multidimensional Pain Inventory subgroups detect differences in outcome after a standard chronic pain management program? *Pain Research & Management* 2009;14(6):445-53. *inappropriate study design*
363. Verra ML, Angst F, Staal JB, et al. Differences in pain, function and coping in Multidimensional Pain Inventory subgroups of chronic back pain: a one-group pretest-posttest study. *BMC musculoskeletal disorders* 2011;12 doi: 10.1186/1471-2474-12-145 *inappropriate study design*
364. VillafaÑE JH, Cleland JA, FernÁNdez-De-Las-PeÑAs C. The Effectiveness of a Manual Therapy and Exercise Protocol in Patients With Thumb Carpometacarpal Osteoarthritis: A Randomized Controlled Trial. *Journal of Orthopaedic & Sports Physical Therapy* 2013;43(4):204-13. *inappropriate intervention*
365. VillafaÑe JH, Silva GB, Bishop MD, et al. Radial Nerve Mobilization Decreases Pain Sensitivity and Improves Motor Performance in Patients With Thumb

- Carpometacarpal Osteoarthritis: A Randomized Controlled Trial. *Archives of Physical Medicine & Rehabilitation* 2012;93(3):396-403. *inappropriate intervention*
366. Villanueva-Torrecillas I. Affectivity, quality of life and health resources utilization in arthritis [Ph.D.]. The University of Arizona, 2003. *inappropriate outcomes*
367. Vincent KR, Vincent HK. Resistance exercise for knee osteoarthritis. *PM & R : the journal of injury, function, and rehabilitation* 2012;4(5 Suppl):S45-52. doi: 10.1016/j.pmrj.2012.01.019 [published Online First: 2012/06/01] *inappropriate study design*
368. Vriezolk JE, Eijsbouts AMM, van Lankveld WGJM, et al. An acceptance-oriented cognitive-behavioral therapy in multimodal rehabilitation: A pre-post test evaluation in highly distressed patients with rheumatic diseases. *Patient education and counseling* 2013;91(3):357-63. doi: 10.1016/j.pec.2013.01.018 *inappropriate study design*
369. Wang C, Schmid CH, Hibberd PL, et al. Tai Chi for treating knee osteoarthritis: designing a long-term follow up randomized controlled trial. *BMC musculoskeletal disorders* 2008;9:108. doi: 10.1186/1471-2474-9-108 [published Online First: 2008/07/31] *inappropriate intervention*
370. Wang CC. Tai Chi and Rheumatic Diseases. *Rheumatic Disease Clinics of North America* 2011;37(1):19-+. doi: 10.1016/j.rdc.2010.11.002 *inappropriate study design*
371. Wang CC. Role of Tai Chi in the Treatment of Rheumatologic Diseases. *Current Rheumatology Reports* 2012;14(6):598-603. doi: 10.1007/s11926-012-0294-y *inappropriate study design*
372. Wang WR, Lopez V, Chow A, et al. A randomized controlled trial of the effectiveness of a self-help psychoeducation programme on outcomes of outpatients with coronary heart disease: study protocol. *Journal of Advanced Nursing* 2014;70(12):2932-41. doi: 10.1111/jan.12397 *inappropriate population*
373. Wepner F, Scheuer R, Schuetz-Wieser B, et al. Effects of vitamin D on patients with fibromyalgia syndrome: a randomized placebo-controlled trial. *Pain* 2014;155(2):261-8. doi: 10.1016/j.pain.2013.10.002 [published Online First: 2014/01/21] *inappropriate intervention*
374. Weze C, Leathard HL, Stevens G. Evaluation of Healing by Gentle Touch for the Treatment of Musculoskeletal Disorders. *American Journal of Public Health* 2004;94(1):50-52. doi: 10.2105/AJPH.94.1.50 *inappropriate intervention*
375. Wicksell RK, Kemani M, Jensen K, et al. Acceptance and commitment therapy for fibromyalgia: A randomized controlled trial. *European Journal of Pain* 2013;17(4):599-611. doi: 10.1002/j.1532-2149.2012.00224.x *inappropriate intervention*
376. Williams DA, Kuper D, Segar M, et al. Internet-enhanced management of fibromyalgia: a randomized controlled trial. *Pain* 2010;151(3):694-702. doi: 10.1016/j.pain.2010.08.034 [published Online First: 2010/09/22] *inappropriate intervention*
377. Witjes S, Hoorntje A, Kuijer P, et al. Does Goal Attainment Scaling improve satisfaction regarding performance of activities of younger knee arthroplasty patients? Study protocol of the randomized controlled ACTION trial. *BMC*

*musculoskeletal disorders* 2016;17 doi: 10.1186/s12891-016-0965-3  
*inappropriate study design*

378. Wylde V, Artz N, Marques E, et al. Effectiveness and cost-effectiveness of outpatient physiotherapy after knee replacement for osteoarthritis: study protocol for a randomised controlled trial. *Trials* 2016;17(1):289. doi: 10.1186/s13063-016-1418-x [published Online First: 2016/06/15] *inappropriate study design*
379. Yang T, Wang H, Chen Y, et al. Effect of continuous administration of conjugated estrogen plus medroxyprogesterone acetate (Premelle) in postmenopausal women in Taiwan. *Journal of the Chinese Medical Association : JCMA* 2004; 67(7). <http://onlinelibrary.wiley.com/doi/10.1111/j.1526-4637.2006.00087.x> *inappropriate intervention*
380. Yelland MJ, Schluter PJ. Defining Worthwhile and Desired Responses to Treatment of Chronic Low Back Pain. *Pain Medicine* 2006;7(1):38-45. doi: 10.1111/j.1526-4637.2006.00087.x *inappropriate population*
381. Young JL. Use of lisdexamfetamine dimesylate in treatment of executive functioning deficits and chronic fatigue syndrome: A double blind, placebo-controlled study. *Psychiatry Research* 2013;207(1-2):127-33. doi: 10.1016/j.psychres.2012.09.007 *inappropriate intervention*
382. Yuan SLK, Matsutani LA, Marques AP. Effectiveness of different styles of massage therapy in fibromyalgia: A systematic review and meta-analysis. *Manual therapy* 2015;20(2):257-64. *inappropriate study design*
383. Yuen AWC, Sander JW. Can slow breathing exercises improve seizure control in people with refractory epilepsy? A hypothesis. *Epilepsy & Behavior* 2010;18(4):331-34. doi: 10.1016/j.yebeh.2010.05.019 *inappropriate population*
384. Zick SM, Wyatt GK, Murphy SL, et al. Acupressure for persistent cancer-related fatigue in breast cancer survivors (AcuCrft): a study protocol for a randomized controlled trial. *BMC Complementary and Alternative Medicine* 2012;12 doi: 10.1186/1472-6882-12-132 *inappropriate population*
385. Zietek P, Zietek J, Szczypior K, et al. Effect of adding one 15-minute-walk on the day of surgery to fast-track rehabilitation after total knee arthroplasty: a randomized, single-blind study. *European journal of physical and rehabilitation medicine* 2015;51(3):245-52. [published Online First: 2014/09/19] *inappropriate intervention*
