# Supplementary material for: Community-deliverable exercise and anxiety in adults with arthritis and other rheumatic diseases: a systematic review with meta-analysis of randomised controlled trials
Source: PubMed Central journal article supplement — BMJ Open. 2018 Feb 17;8(2):e019138. doi: 10.1136/bmjopen-2017-019138 (PMC5855450; doi:10.1136/bmjopen-2017-019138), 2018-02-17
Supplement: bmjopen-2017-019138supp003.pdf [file bmjopen-2017-019138supp003.pdf]

Supplementary File 3. Study-level risk of bias results using the Cochrane Collaboration Instrument.

| Reference                                            | Random Sequence | Allocation Concealment | Blinding (Participants & Personnel) | Blinding (Outcome Assessors) | Incomplete Outcome Data | Selective Reporting | Inactive |
|------------------------------------------------------|-----------------|------------------------|-------------------------------------|------------------------------|-------------------------|---------------------|----------|
| Baptista et al., 2012 <sup>40</sup>                  | low             | low                    | high                                | low                          | low                     | low                 | unclear  |
| Beltran, 2003 <sup>41</sup>                          | low             | unclear                | high                                | unclear                      | low                     | unclear             | low      |
| Cheung et al., 2017 <sup>42</sup>                    | low             | high                   | high                                | unclear                      | low                     | low                 | unclear  |
| Fransen et al., 2007 <sup>43</sup>                   | low             | unclear                | high                                | low                          | low                     | low                 | low      |
| French et al., 2013 <sup>44</sup>                    | low             | low                    | high                                | high                         | low                     | unclear             | unclear  |
| Gowans et al., 2001 <sup>45</sup>                    | low             | unclear                | high                                | low                          | low                     | unclear             | unclear  |
| Jones et al., 2008 <sup>46</sup>                     | low             | unclear                | high                                | unclear                      | low                     | unclear             | low      |
| Komatireddy et al. <sup>47</sup>                     | low             | unclear                | high                                | low                          | low                     | unclear             | unclear  |
| Minor et al., 1989 <sup>48</sup>                     | low             | unclear                | high                                | unclear                      | unclear                 | unclear             | low      |
| Munguia-Izquierdo & Legaz-Arrese, 2008 <sup>49</sup> | low             | unclear                | high                                | low                          | low                     | unclear             | low      |
| Sanudo et al., 2015 <sup>50</sup>                    | low             | unclear                | high                                | unclear                      | unclear                 | unclear             | unclear  |
| Schachter et al., 2003 <sup>51</sup>                 | high            | high                   | high                                | unclear                      | low                     | unclear             | low      |
| Tomas-Carus et al., 2008 <sup>52</sup>               | low             | low                    | high                                | low                          | low                     | unclear             | low      |
| Tomas-Carus et al., 2007 <sup>53</sup>               | low             | unclear                | high                                | unclear                      | unclear                 | unclear             | low      |

Notes: low, low risk of bias; high, high risk of bias; unclear, unclear risk of bias.
