# Supplementary material for: Community-deliverable exercise and anxiety in adults with arthritis and other rheumatic diseases: a systematic review with meta-analysis of randomised controlled trials
Source: PubMed Central journal article supplement — BMJ Open. 2018 Feb 17;8(2):e019138. doi: 10.1136/bmjopen-2017-019138 (PMC5855450; doi:10.1136/bmjopen-2017-019138), 2018-02-17
Supplement: bmjopen-2017-019138supp004.pdf [file bmjopen-2017-019138supp004.pdf]

Supplementary file 4. Simple meta-regression results with changes in anxiety as the outcome.

| Comparison                                                                 | ES (#)    | R          | R <sup>2</sup> | F(p)                    |
|----------------------------------------------------------------------------|-----------|------------|----------------|-------------------------|
| <i>Study Characteristics</i>                                               |           |            |                |                         |
| - Journal impact factor                                                    | 16        | .22        | .05            | 0.4(0.52)               |
| <b>- Year of publication</b>                                               | <b>16</b> | <b>.75</b> | <b>.56</b>     | <b>51.5(&lt;0.001)*</b> |
| - Country study conducted (USA vs. other)                                  | 16        | .13        | .02            | 0.2(0.69)               |
| - Type of control (exposure vs. no exposure) <sup>a</sup>                  | 16        | .08        | .02            | 0.01(0.76)              |
| - Matching (yes vs. no)                                                    | 16        | .39        | .15            | 1.2(0.29)               |
| - Random sequencing (high/unclear vs. low)                                 | 16        | .05        | .0003          | 0.17(0.69)              |
| - Allocation concealment (high/unclear vs. low)                            | 16        | .22        | .05            | 0.87(0.37)              |
| - Blinding of participants & personnel (high/unclear vs. low) <sup>b</sup> | NA        | NA         | NA             | NA                      |
| - Blinding of outcome assessors (high/unclear vs low)                      | 16        | .08        | .007           | 0.43(0.66)              |
| <b>- Incomplete outcome data (high/unclear vs low)</b>                     | <b>16</b> | <b>.67</b> | <b>.45</b>     | <b>14.4(0.002)*</b>     |
| - Selective reporting (Unclear vs low)                                     | 16        | .39        | .15            | 4.1(0.06)               |
| - Participants physically inactive (high/unclear vs low)                   | 16        | .21        | .04            | 0.75(0.40)              |
| <b>- Sample size estimates provided (no versus yes)</b>                    | <b>16</b> | <b>.56</b> | <b>.32</b>     | <b>4.6(0.05)*</b>       |
| <b>- Agreed to participate in study (%)</b>                                | <b>12</b> | <b>.47</b> | <b>.22</b>     | <b>4.9(0.05)*</b>       |
| <b>- Study funded (no versus yes)</b>                                      | <b>16</b> | <b>.34</b> | <b>.12</b>     | <b>15.9(0.001)*</b>     |
| - Type of analysis (abp vs itt) <sup>c</sup>                               | 19        | .21        | .05            | 0.89(0.36)              |
| - Test used (STAI and FIQ vs. AIMS) <sup>d,e</sup>                         | 19        | .41        | .17            | 2.3(0.14)               |
| <i>Participant Characteristics</i>                                         |           |            |                |                         |
| <b>- Exercise dropouts (%)</b>                                             | <b>15</b> | <b>.34</b> | <b>.12</b>     | <b>8.2(0.01)*</b>       |
| - Control dropouts (%)                                                     | 13        | .31        | .10            | 1.3(0.27)               |
| <b>- Age (years)</b>                                                       | <b>14</b> | <b>.53</b> | <b>.28</b>     | <b>11.9(.005)*</b>      |
| - Gender (mixed vs. females)                                               | 16        | .14        | .02            | .38(0.54)               |
| - AORD (rheumatoid/osteoarthritis vs. fibromyalgia)                        | 16        | .10        | .01            | .15(0.71)               |
| - Rheumatic symptoms (years)                                               | 8         | .37        | .14            | 1.45(0.27)              |
| - Years since diagnosis                                                    | 4         | .23        | .05            | .33(0.62)               |

*Exercise Intervention Characteristics*

|                                                                 |           |            |            |                         |
|-----------------------------------------------------------------|-----------|------------|------------|-------------------------|
| <b>Exercise modality (aerobic/weight training vs. both)</b>     | <b>16</b> | <b>.57</b> | <b>.32</b> | <b>8.19(0.01)*</b>      |
| Land vs. water-based exercise                                   | 16        | .30        | .09        | 1.03(0.33)              |
| Length of training (weeks)                                      | 16        | .16        | .51        | .44(0.52)               |
| Frequency of training (times/week)                              | 14        | .02        | .0004      | .01(0.92)               |
| <b>Duration of training (min/session)</b>                       | <b>12</b> | <b>.43</b> | <b>.18</b> | <b>7.7(0.02)*</b>       |
| Compliance (% of exercise sessions attended)                    | 8         | .04        | .001       | .02(0.90)               |
| <b>Minutes of training per week</b>                             | <b>11</b> | <b>.61</b> | <b>.37</b> | <b>33.1(.0003)*</b>     |
| Minutes of training per week (adjusted for compliance)          | 7         | .17        | .03        | .19(0.68)               |
| <b>Total minutes of training</b>                                | <b>11</b> | <b>.63</b> | <b>.40</b> | <b>15.0(0.004)*</b>     |
| Total minutes of training (adjusted for compliance)             | 7         | .22        | .05        | 0.32(0.60)              |
| <b>Supervision status (unsupervised or supervised vs. both)</b> | <b>16</b> | <b>.49</b> | <b>.24</b> | <b>4.20(0.04)*</b>      |
| <b>Location of exercise (facility or home vs both)</b>          | <b>16</b> | <b>.49</b> | <b>.24</b> | <b>4.20(0.04)*</b>      |
| <b>Participation (group or self vs. both)</b>                   | <b>16</b> | <b>.49</b> | <b>.24</b> | <b>4.20(0.04)*</b>      |
| Adverse events (yes vs. no)                                     | 5         | .23        | .05        | .17(0.71)               |
| <i>Changes in Secondary Outcomes</i>                            |           |            |            |                         |
| Physical function                                               | 12        | .26        | .07        | 0.87(0.37)              |
| Pain                                                            | 15        | .09        | .008       | 0.32(0.58)              |
| <b>Depression</b>                                               | <b>13</b> | <b>.35</b> | <b>.12</b> | <b>7.49(0.01)*</b>      |
| <b>Quality of life</b>                                          | <b>13</b> | <b>.79</b> | <b>.63</b> | <b>45.8(&lt;0.001)*</b> |
| VO <sub>2max</sub> (ml·kg <sup>-1</sup> ·min <sup>-1</sup> )    | 7         | .62        | .38        | 2.27(0.19)              |
| Muscular strength                                               | 6         | 0.30       | .09        | .30(0.61)               |

Notes: abp, analysis-by-protocol; itt, intention-to-treat; STAI, State-Trait Anxiety Inventory; FIQ, Fibromyalgia Impact Questionnaire; AIMS, Arthritis Impact Measurement Scale; <sup>a</sup>, Exposure, includes attention control, usual care and other types of exposure while no exposure, includes nonintervention and wait-list controls; <sup>b</sup>, NA, not applicable because all studies considered at high risk of bias given the inability to blind participants to exercise interventions; <sup>c</sup>, number of groups exceed 16 because two studies reported results for both abp and itt analysis; <sup>d</sup>, insufficient number of outcomes to include the DASS, HADS, MHI

and VAS; <sup>e</sup>. number of groups exceed 16 because three studies reported anxiety results using two different instruments;
