# Supplementary material for: Community-deliverable exercise and anxiety in adults with arthritis and other rheumatic diseases: a systematic review with meta-analysis of randomised controlled trials
Source: PubMed Central journal article supplement — BMJ Open. 2018 Feb 17;8(2):e019138. doi: 10.1136/bmjopen-2017-019138 (PMC5855450; doi:10.1136/bmjopen-2017-019138), 2018-02-17
Supplement: bmjopen-2017-019138supp005.pdf [file bmjopen-2017-019138supp005.pdf]

**Supplementary file 5. GRADE results.**

**Author(s):** What are the effects of exercise (aerobic, strength training, or both) on anxiety in adults with arthritis and other rheumatic diseases? **Date:** July 3, 2017

**Question:** Exercise compared to control for reducing anxiety in adults with arthritis and other rheumatic diseases

**Setting:** Home, Facility, Both

| Quality assessment                                                                   |                   |              |               |              |             |                                                                                                                           | No of patients |         | Effect            |                                                   | Quality      | Importance |
|--------------------------------------------------------------------------------------|-------------------|--------------|---------------|--------------|-------------|---------------------------------------------------------------------------------------------------------------------------|----------------|---------|-------------------|---------------------------------------------------|--------------|------------|
| No of studies                                                                        | Study design      | Risk of bias | Inconsistency | Indirectness | Imprecision | Other considerations                                                                                                      | exercise       | control | Relative (95% CI) | Absolute (95% CI)                                 |              |            |
| Anxiety (follow up: mean 15.3 weeks; assessed with: Various self-report instruments) |                   |              |               |              |             |                                                                                                                           |                |         |                   |                                                   |              |            |
| 14                                                                                   | randomized trials | not serious  | not serious   | not serious  | not serious | publication bias strongly suspected; all plausible residual confounding would reduce the demonstrated effect <sup>a</sup> | 514            | 369     | not estimable     | SMD 0.4<br>SD lower<br>(0.65 lower to 0.15 lower) | ⊕⊕⊕⊕<br>HIGH | CRITICAL   |

CI: Confidence interval; SMD: Standardized mean difference

## Explanations

a. Statistically significant small-study effects, suggesting the possibility of publication bias, possible confounding by year of publication, with the magnitude of effect over time smaller with more recent studies.
